# Supplementary material for: Structural Characterization of Lithium and Sodium Bulky Bis(silyl)amide Complexes
Source: MDPI journal article supplement (doi:10.3390/molecules23051138), 2018-05-10

# checkCIF/PLATON report

Structure factors have been supplied for datablock(s) 1, 10, 2, 3, 4, 5, 6, 7, 8, 9-THF

THIS REPORT IS FOR GUIDANCE ONLY. IF USED AS PART OF A REVIEW PROCEDURE FOR PUBLICATION, IT SHOULD NOT REPLACE THE EXPERTISE OF AN EXPERIENCED CRYSTALLOGRAPHIC REFEREE.

No syntax errors found.      CIF dictionary      Interpreting this report

## Datablock: 1

---

|                 |                                                      |                    |
|-----------------|------------------------------------------------------|--------------------|
| Bond precision: | C-C = 0.0020 Å                                       | Wavelength=1.54184 |
| Cell:           | a=8.81051(9)      b=13.36759(16)      c=18.58518(19) |                    |
|                 | alpha=90      beta=99.1278(10)      gamma=90         |                    |
| Temperature:    | 150 K                                                |                    |
|                 | Calculated                                           | Reported           |
| Volume          | 2161.16(4)                                           | 2161.16(4)         |
| Space group     | P 21/n                                               | P 1 21/n 1         |
| Hall group      | -P 2yn                                               | -P 2yn             |
| Moiety formula  | C18 H43 N Si2                                        | C18 H43 N Si2      |
| Sum formula     | C18 H43 N Si2                                        | C18 H43 N Si2      |
| Mr              | 329.71                                               | 329.71             |
| Dx,g cm-3       | 1.013                                                | 1.013              |
| Z               | 4                                                    | 4                  |
| Mu (mm-1)       | 1.436                                                | 1.436              |
| F000            | 744.0                                                | 744.0              |
| F000'           | 747.36                                               |                    |
| h,k,lmax        | 10,16,22                                             | 10,16,22           |
| Nref            | 3965                                                 | 3938               |
| Tmin,Tmax       | 0.866,0.931                                          | 0.279,1.000        |
| Tmin'           | 0.866                                                |                    |

Correction method= # Reported T Limits: Tmin=0.279 Tmax=1.000  
AbsCorr = MULTI-SCAN

Data completeness= 0.993      Theta(max)= 68.229

R(reflections)= 0.0399( 3762)      wR2(reflections)= 0.1124( 3938)

S = 1.066      Npar= 209

---

The following ALERTS were generated. Each ALERT has the format  
**test-name\_ALERT\_alert-type\_alert-level.**  
Click on the hyperlinks for more details of the test.

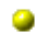

### Alert level C

---

|                   |                                                  |        |      |        |        |
|-------------------|--------------------------------------------------|--------|------|--------|--------|
| PLAT420_ALERT_2_C | D-H Without Acceptor                             | N1     | --H1 | Please | Check  |
| PLAT911_ALERT_3_C | Missing FCF Refl Between Thmin & STh/L=          | 0.600  |      | 22     | Report |
| PLAT918_ALERT_3_C | Reflection(s) with I(obs) much Smaller I(calc) . |        |      | 3      | Check  |
| PLAT922_ALERT_1_C | wR2 in the CIF and FCF Differ by .....           | 0.0013 |      |        | Check  |
| PLAT923_ALERT_1_C | S Values in the CIF and FCF Differ by .....      | 0.013  |      |        | Check  |
| PLAT939_ALERT_3_C | Large Value of Not (SHELXL) Weight Optimized S . | 13.57  |      |        | Check  |

---

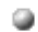

### Alert level G

---

|                   |                                                  |       |  |     |        |
|-------------------|--------------------------------------------------|-------|--|-----|--------|
| PLAT002_ALERT_2_G | Number of Distance or Angle Restraints on AtSite |       |  | 5   | Note   |
| PLAT007_ALERT_5_G | Number of Unrefined Donor-H Atoms .....          |       |  | 1   | Report |
| PLAT176_ALERT_4_G | The CIF-Embedded .res File Contains SADI Records |       |  | 2   | Report |
| PLAT301_ALERT_3_G | Main Residue Disorder .....(Resd 1 )             |       |  | 10% | Note   |
| PLAT860_ALERT_3_G | Number of Least-Squares Restraints .....         |       |  | 2   | Note   |
| PLAT912_ALERT_4_G | Missing # of FCF Reflections Above STh/L=        | 0.600 |  | 5   | Note   |
| PLAT978_ALERT_2_G | Number C-C Bonds with Positive Residual Density. |       |  | 6   | Info   |

---

- 0 **ALERT level A** = Most likely a serious problem - resolve or explain  
0 **ALERT level B** = A potentially serious problem, consider carefully  
6 **ALERT level C** = Check. Ensure it is not caused by an omission or oversight  
7 **ALERT level G** = General information/check it is not something unexpected

- 2 ALERT type 1 CIF construction/syntax error, inconsistent or missing data  
3 ALERT type 2 Indicator that the structure model may be wrong or deficient  
5 ALERT type 3 Indicator that the structure quality may be low  
2 ALERT type 4 Improvement, methodology, query or suggestion  
1 ALERT type 5 Informative message, check
- 

## Datablock: 2

---

Bond precision: C-C = 0.0043 A

Wavelength=0.71073

Cell: a=10.2374(8) b=11.9719(8) c=12.6730(7)  
alpha=83.508(5) beta=76.177(6) gamma=68.182(7)  
Temperature: 100 K

|                | Calculated         | Reported           |
|----------------|--------------------|--------------------|
| Volume         | 1399.69(18)        | 1399.69(18)        |
| Space group    | P -1               | P -1               |
| Hall group     | -P 1               | -P 1               |
| Moiety formula | C18 H48 Li2 N2 Si4 | C18 H48 Li2 N2 Si4 |
| Sum formula    | C18 H48 Li2 N2 Si4 | C18 H48 Li2 N2 Si4 |
| Mr             | 418.82             | 418.82             |
| Dx,g cm-3      | 0.994              | 0.994              |
| Z              | 2                  | 2                  |
| Mu (mm-1)      | 0.217              | 0.217              |
| F000           | 464.0              | 464.0              |
| F000'          | 464.72             |                    |
| h,k,lmax       | 12,14,15           | 12,14,15           |
| Nref           | 5139               | 5102               |
| Tmin,Tmax      | 0.950,0.970        | 0.921,0.967        |
| Tmin'          | 0.916              |                    |

Correction method= # Reported T Limits: Tmin=0.921 Tmax=0.967  
AbsCorr = ANALYTICAL

Data completeness= 0.993                      Theta(max)= 25.348

R(reflections)= 0.0505( 3815)              wR2(reflections)= 0.1214( 5102)

S = 1.034                                      Npar= 282

The following ALERTS were generated. Each ALERT has the format  
**test-name\_ALERT\_alert-type\_alert-level.**  
Click on the hyperlinks for more details of the test.

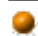

#### Alert level B

PLAT049\_ALERT\_1\_B Calculated Density Less Than 1.0 gcm-3 ..... 0.9938 Check

**Author Response: This compound is a Li salt. Densities below 1.0 are a common problem for compounds such as this. Inspection of the data with PLATON suggests no missing symmetry elements.**

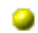

#### Alert level C

|                                                                    |              |
|--------------------------------------------------------------------|--------------|
| PLAT241_ALERT_2_C High 'MainMol' Ueq as Compared to Neighbors of   | C7 Check     |
| PLAT340_ALERT_3_C Low Bond Precision on C-C Bonds .....            | 0.00433 Ang. |
| PLAT906_ALERT_3_C Large K Value in the Analysis of Variance .....  | 2.134 Check  |
| PLAT910_ALERT_3_C Missing # of FCF Reflection(s) Below Theta(Min). | 5 Note       |
| PLAT911_ALERT_3_C Missing FCF Refl Between Thmin & STh/L= 0.600    | 28 Report    |

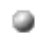

#### Alert level G

|                                                                    |          |
|--------------------------------------------------------------------|----------|
| PLAT002_ALERT_2_G Number of Distance or Angle Restraints on AtSite | 11 Note  |
| PLAT003_ALERT_2_G Number of Uiso or Uij Restrained non-H Atoms ... | 7 Report |

|                   |                                                  |           |
|-------------------|--------------------------------------------------|-----------|
| PLAT066_ALERT_1_G | Predicted and Reported Tmin&Tmax Range Identical | ? Check   |
| PLAT176_ALERT_4_G | The CIF-Embedded .res File Contains SADI Records | 1 Report  |
| PLAT178_ALERT_4_G | The CIF-Embedded .res File Contains SIMU Records | 1 Report  |
| PLAT301_ALERT_3_G | Main Residue Disorder .....(Resd 1 )             | 12% Note  |
| PLAT343_ALERT_2_G | Unusual Angle Range in Main Residue for          | C5 Check  |
| PLAT343_ALERT_2_G | Unusual Angle Range in Main Residue for          | C7 Check  |
| PLAT343_ALERT_2_G | Unusual Angle Range in Main Residue for          | C14 Check |
| PLAT343_ALERT_2_G | Unusual Angle Range in Main Residue for          | C16 Check |
| PLAT793_ALERT_4_G | Model has Chirality at Si1 (Centro SPGR)         | S Verify  |
| PLAT860_ALERT_3_G | Number of Least-Squares Restraints .....         | 90 Note   |
| PLAT912_ALERT_4_G | Missing # of FCF Reflections Above STh/L= 0.600  | 5 Note    |
| PLAT978_ALERT_2_G | Number C-C Bonds with Positive Residual Density. | 1 Info    |

---

0 **ALERT level A** = Most likely a serious problem - resolve or explain  
 1 **ALERT level B** = A potentially serious problem, consider carefully  
 5 **ALERT level C** = Check. Ensure it is not caused by an omission or oversight  
 14 **ALERT level G** = General information/check it is not something unexpected

2 ALERT type 1 CIF construction/syntax error, inconsistent or missing data  
 8 ALERT type 2 Indicator that the structure model may be wrong or deficient  
 6 ALERT type 3 Indicator that the structure quality may be low  
 4 ALERT type 4 Improvement, methodology, query or suggestion  
 0 ALERT type 5 Informative message, check

---

## Datablock: 3

---

Bond precision: C-C = 0.0037 A

Wavelength=0.71073

Cell: a=12.4492(4) b=16.4469(6) c=17.6144(6)  
 alpha=67.932(3) beta=80.537(3) gamma=89.926(3)  
 Temperature: 150 K

|                | Calculated         | Reported           |
|----------------|--------------------|--------------------|
| Volume         | 3289.6(2)          | 3289.7(2)          |
| Space group    | P -1               | P -1               |
| Hall group     | -P 1               | -P 1               |
| Moiety formula | C24 H60 Li2 N2 Si4 | C24 H60 Li2 N2 Si4 |
| Sum formula    | C24 H60 Li2 N2 Si4 | C24 H60 Li2 N2 Si4 |
| Mr             | 502.98             | 502.98             |
| Dx,g cm-3      | 1.016              | 1.016              |
| Z              | 4                  | 4                  |
| Mu (mm-1)      | 0.194              | 0.194              |
| F000           | 1120.0             | 1120.0             |
| F000'          | 1121.50            |                    |
| h,k,lmax       | 14,19,21           | 14,19,21           |
| Nref           | 12032              | 11975              |
| Tmin,Tmax      | 0.940,0.968        | 0.365,1.000        |
| Tmin'          | 0.895              |                    |

Correction method= # Reported T Limits: Tmin=0.365 Tmax=1.000  
AbsCorr = GAUSSIAN

Data completeness= 0.995

Theta(max)= 25.349

R(reflections)= 0.0443( 9260)

wR2(reflections)= 0.1082( 11975)

S = 1.031

Npar= 613

---

The following ALERTS were generated. Each ALERT has the format

**test-name\_ALERT\_alert-type\_alert-level.**

Click on the hyperlinks for more details of the test.

---

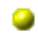

#### Alert level C

|                   |                                                  |      |        |
|-------------------|--------------------------------------------------|------|--------|
| PLAT094_ALERT_2_C | Ratio of Maximum / Minimum Residual Density .... | 2.06 | Report |
| PLAT230_ALERT_2_C | Hirshfeld Test Diff for Si1 --C1 .               | 5.6  | s.u.   |
| PLAT230_ALERT_2_C | Hirshfeld Test Diff for C1 --C2 .                | 5.7  | s.u.   |
| PLAT241_ALERT_2_C | High 'MainMol' Ueq as Compared to Neighbors of   | C2   | Check  |
| PLAT910_ALERT_3_C | Missing # of FCF Reflection(s) Below Theta(Min). | 5    | Note   |
| PLAT911_ALERT_3_C | Missing FCF Refl Between Thmin & STh/L= 0.600    | 48   | Report |
| PLAT978_ALERT_2_C | Number C-C Bonds with Positive Residual Density. | 0    | Info   |

---



#### Alert level G

|                   |                                                  |       |        |
|-------------------|--------------------------------------------------|-------|--------|
| PLAT154_ALERT_1_G | The s.u.'s on the Cell Angles are Equal ..(Note) | 0.003 | Degree |
| PLAT303_ALERT_2_G | Full Occupancy Atom H2C with # Connections       | 2.00  | Check  |
| PLAT303_ALERT_2_G | Full Occupancy Atom H10C with # Connections      | 2.00  | Check  |
| PLAT303_ALERT_2_G | Full Occupancy Atom H14C with # Connections      | 2.00  | Check  |
| PLAT303_ALERT_2_G | Full Occupancy Atom H22C with # Connections      | 2.00  | Check  |
| PLAT303_ALERT_2_G | Full Occupancy Atom H38A with # Connections      | 2.00  | Check  |
| PLAT343_ALERT_2_G | Unusual Angle Range in Main Residue for          | C10   | Check  |
| PLAT343_ALERT_2_G | Unusual Angle Range in Main Residue for          | C22   | Check  |
| PLAT793_ALERT_4_G | Model has Chirality at C1 (Centro SPGR)          | S     | Verify |
| PLAT793_ALERT_4_G | Model has Chirality at C13 (Centro SPGR)         | S     | Verify |
| PLAT793_ALERT_4_G | Model has Chirality at C37 (Centro SPGR)         | R     | Verify |
| PLAT912_ALERT_4_G | Missing # of FCF Reflections Above STh/L= 0.600  | 5     | Note   |
| PLAT913_ALERT_3_G | Missing # of Very Strong Reflections in FCF .... | 1     | Note   |

---

0 **ALERT level A** = Most likely a serious problem - resolve or explain  
0 **ALERT level B** = A potentially serious problem, consider carefully  
7 **ALERT level C** = Check. Ensure it is not caused by an omission or oversight  
13 **ALERT level G** = General information/check it is not something unexpected

1 ALERT type 1 CIF construction/syntax error, inconsistent or missing data  
12 ALERT type 2 Indicator that the structure model may be wrong or deficient  
3 ALERT type 3 Indicator that the structure quality may be low  
4 ALERT type 4 Improvement, methodology, query or suggestion  
0 ALERT type 5 Informative message, check

---

## Datablock: 4

---

Bond precision: C-C = 0.0071 A

Wavelength=0.71073

Cell: a=16.2998(17) b=12.2405(7) c=20.6644(19)  
 alpha=90 beta=112.441(12) gamma=90  
 Temperature: 100 K

|                | Calculated           | Reported             |
|----------------|----------------------|----------------------|
| Volume         | 3810.7(7)            | 3810.7(7)            |
| Space group    | P 21/c               | P 1 21/c 1           |
| Hall group     | -P 2ybc              | -P 2ybc              |
| Moiety formula | C28 H68 Li2 N2 O Si4 | C28 H68 Li2 N2 O Si4 |
| Sum formula    | C28 H68 Li2 N2 O Si4 | C28 H68 Li2 N2 O Si4 |
| Mr             | 575.08               | 575.08               |
| Dx,g cm-3      | 1.002                | 1.002                |
| Z              | 4                    | 4                    |
| Mu (mm-1)      | 0.176                | 0.176                |
| F000           | 1280.0               | 1280.0               |
| F000'          | 1281.58              |                      |
| h,k,lmax       | 19,14,24             | 19,14,24             |
| Nref           | 6973                 | 5777                 |
| Tmin,Tmax      | 0.943,0.968          | 0.167,1.000          |
| Tmin'          | 0.911                |                      |

Correction method= # Reported T Limits: Tmin=0.167 Tmax=1.000  
 AbsCorr = MULTI-SCAN

Data completeness= 0.828 Theta(max)= 25.349

R(reflections)= 0.0714( 3543) wR2(reflections)= 0.1846( 5777)

S = 1.001 Npar= 354

The following ALERTS were generated. Each ALERT has the format

**test-name\_ALERT\_alert-type\_alert-level.**

Click on the hyperlinks for more details of the test.

#### Alert level A

PLAT029\_ALERT\_3\_A \_diffn\_measured\_fraction\_theta\_full value Low . 0.831 Why?

**Author Response: Incorrect symmetry identified during pre-experiment (orthorhombic vs. monoclinic) which was not identified until after collection. The sensitivity of the compound precluded recollection and it is included only for completeness in the publication to show the identity of the compound.**

#### Alert level B

PLAT911\_ALERT\_3\_B Missing FCF Refl Between Thmin & STh/L= 0.600 1162 Report

**Author Response: Incorrect symmetry identified during pre-experiment (orthorhombic vs. monoclinic) which was not identified until after collection. The sensitivity of the compound precluded recollection and it is included only for completeness in the publication to show the identity of the compound.**

---

● **Alert level C**

|                   |                                                  |         |       |
|-------------------|--------------------------------------------------|---------|-------|
| PLAT340_ALERT_3_C | Low Bond Precision on C-C Bonds .....            | 0.00707 | Ang.  |
| PLAT906_ALERT_3_C | Large K Value in the Analysis of Variance .....  | 2.281   | Check |
| PLAT910_ALERT_3_C | Missing # of FCF Reflection(s) Below Theta(Min). | 6       | Note  |
| PLAT978_ALERT_2_C | Number C-C Bonds with Positive Residual Density. | 0       | Info  |

---

● **Alert level G**

|                   |                                           |       |    |      |
|-------------------|-------------------------------------------|-------|----|------|
| PLAT912_ALERT_4_G | Missing # of FCF Reflections Above STh/L= | 0.600 | 29 | Note |
|-------------------|-------------------------------------------|-------|----|------|

- 
- 1 **ALERT level A** = Most likely a serious problem - resolve or explain
  - 1 **ALERT level B** = A potentially serious problem, consider carefully
  - 4 **ALERT level C** = Check. Ensure it is not caused by an omission or oversight
  - 1 **ALERT level G** = General information/check it is not something unexpected

- 0 ALERT type 1 CIF construction/syntax error, inconsistent or missing data
  - 1 ALERT type 2 Indicator that the structure model may be wrong or deficient
  - 5 ALERT type 3 Indicator that the structure quality may be low
  - 1 ALERT type 4 Improvement, methodology, query or suggestion
  - 0 ALERT type 5 Informative message, check
- 

## Datablock: 5

---

Bond precision: C-C = 0.0077 A

Wavelength=0.71073

Cell: a=9.1355(11) b=11.0906(18) c=12.644(2)  
alpha=63.996(16) beta=77.951(12) gamma=68.950(13)

Temperature: 150 K

|                | Calculated         | Reported           |
|----------------|--------------------|--------------------|
| Volume         | 1072.5(3)          | 1072.5(3)          |
| Space group    | P -1               | P -1               |
| Hall group     | -P 1               | -P 1               |
| Moiety formula | C32 H78 Li4 N2 Si4 | C32 H78 Li4 N2 Si4 |
| Sum formula    | C32 H78 Li4 N2 Si4 | C32 H78 Li4 N2 Si4 |
| Mr             | 631.08             | 631.08             |
| Dx,g cm-3      | 0.977              | 0.977              |
| Z              | 1                  | 1                  |
| Mu (mm-1)      | 0.159              | 0.159              |
| F000           | 352.0              | 352.0              |
| F000'          | 352.39             |                    |
| h,k,lmax       | 11,13,15           | 11,13,15           |
| Nref           | 3913               | 3865               |
| Tmin,Tmax      | 0.952,0.973        | 0.580,1.000        |
| Tmin'          | 0.948              |                    |

Correction method= # Reported T Limits: Tmin=0.580 Tmax=1.000  
AbsCorr = GAUSSIAN

Data completeness= 0.988                      Theta(max)= 25.350

R(reflections)= 0.0806( 2719)              wR2(reflections)= 0.2168( 3865)

S = 1.117                                      Npar= 218

The following ALERTS were generated. Each ALERT has the format  
**test-name\_ALERT\_alert-type\_alert-level.**  
Click on the hyperlinks for more details of the test.

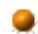

#### Alert level B

PLAT049\_ALERT\_1\_B Calculated Density Less Than 1.0 gcm-3 ..... 0.9771 Check

**Author Response: This compound is a Li salt. Densities below 1.0 are a common problem for compounds such as this. Inspection of the data with PLATON suggests no missing symmetry elements.**

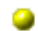

#### Alert level C

PLAT340\_ALERT\_3\_C Low Bond Precision on C-C Bonds ..... 0.00767 Ang.  
PLAT906\_ALERT\_3\_C Large K Value in the Analysis of Variance ..... 8.651 Check  
PLAT906\_ALERT\_3\_C Large K Value in the Analysis of Variance ..... 2.055 Check  
PLAT911\_ALERT\_3\_C Missing FCF Refl Between Thmin & STh/L= 0.600 47 Report  
PLAT934\_ALERT\_3\_C Number of (Iobs-Icalc)/SigmaW > 10 Outliers .... 1 Check  
PLAT977\_ALERT\_2\_C Check Negative Difference Density on H13D -0.48 eA-3  
PLAT977\_ALERT\_2\_C Check Negative Difference Density on H13B -0.47 eA-3  
PLAT978\_ALERT\_2\_C Number C-C Bonds with Positive Residual Density. 0 Info

## ● Alert level G

|                   |                                                  |     |        |
|-------------------|--------------------------------------------------|-----|--------|
| PLAT002_ALERT_2_G | Number of Distance or Angle Restraints on AtSite | 7   | Note   |
| PLAT003_ALERT_2_G | Number of Uiso or Uij Restrained non-H Atoms ... | 7   | Report |
| PLAT176_ALERT_4_G | The CIF-Embedded .res File Contains SADI Records | 3   | Report |
| PLAT178_ALERT_4_G | The CIF-Embedded .res File Contains SIMU Records | 1   | Report |
| PLAT301_ALERT_3_G | Main Residue Disorder .....(Resd 1 )             | 14% | Note   |
| PLAT860_ALERT_3_G | Number of Least-Squares Restraints .....         | 81  | Note   |
| PLAT910_ALERT_3_G | Missing # of FCF Reflection(s) Below Theta(Min). | 1   | Note   |

---

0 **ALERT level A** = Most likely a serious problem - resolve or explain  
1 **ALERT level B** = A potentially serious problem, consider carefully  
8 **ALERT level C** = Check. Ensure it is not caused by an omission or oversight  
7 **ALERT level G** = General information/check it is not something unexpected

1 ALERT type 1 CIF construction/syntax error, inconsistent or missing data  
5 ALERT type 2 Indicator that the structure model may be wrong or deficient  
8 ALERT type 3 Indicator that the structure quality may be low  
2 ALERT type 4 Improvement, methodology, query or suggestion  
0 ALERT type 5 Informative message, check

---

## Datablock: 6

---

Bond precision: C-C = 0.0043 A                      Wavelength=0.71073

Cell:                      a=17.6846(12)              b=9.6929(6)              c=30.5856(17)  
                            alpha=90                      beta=104.603(7)              gamma=90

Temperature:              150 K

|                | Calculated          | Reported            |
|----------------|---------------------|---------------------|
| Volume         | 5073.5(6)           | 5073.5(6)           |
| Space group    | P 21/c              | P 1 21/c 1          |
| Hall group     | -P 2ybc             | -P 2ybc             |
| Moiety formula | C19 H46 Li N O2 Si2 | C19 H46 Li N O2 Si2 |
| Sum formula    | C19 H46 Li N O2 Si2 | C19 H46 Li N O2 Si2 |
| Mr             | 383.69              | 383.69              |
| Dx,g cm-3      | 1.005               | 1.005               |
| Z              | 8                   | 8                   |
| Mu (mm-1)      | 0.150               | 0.150               |
| F000           | 1712.0              | 1712.0              |
| F000'          | 1713.79             |                     |
| h,k,lmax       | 22,12,38            | 22,12,38            |
| Nref           | 10398               | 10309               |
| Tmin,Tmax      | 0.982,0.985         | 0.449,1.000         |
| Tmin'          | 0.956               |                     |

Correction method= # Reported T Limits: Tmin=0.449 Tmax=1.000  
AbsCorr = MULTI-SCAN

Data completeness= 0.991

Theta(max)= 26.396

R(reflections)= 0.0571( 6928)

wR2(reflections)= 0.1419( 10309)

S = 1.020

Npar= 477

---

The following ALERTS were generated. Each ALERT has the format

**test-name\_ALERT\_alert-type\_alert-level.**

Click on the hyperlinks for more details of the test.

---



#### Alert level C

|                   |                                                  |         |        |
|-------------------|--------------------------------------------------|---------|--------|
| PLAT241_ALERT_2_C | High 'MainMol' Ueq as Compared to Neighbors of   | C17     | Check  |
| PLAT340_ALERT_3_C | Low Bond Precision on C-C Bonds .....            | 0.00425 | Ang.   |
| PLAT360_ALERT_2_C | Short C(sp3)-C(sp3) Bond C17 - C18 .             | 1.42    | Ang.   |
| PLAT906_ALERT_3_C | Large K Value in the Analysis of Variance .....  | 4.448   | Check  |
| PLAT911_ALERT_3_C | Missing FCF Refl Between Thmin & STh/L= 0.600    | 41      | Report |
| PLAT921_ALERT_1_C | R1 in the CIF and FCF Differ by .....            | 0.0015  | Check  |
| PLAT922_ALERT_1_C | wR2 in the CIF and FCF Differ by .....           | 0.0031  | Check  |
| PLAT923_ALERT_1_C | S Values in the CIF and FCF Differ by .....      | 0.023   | Check  |
| PLAT977_ALERT_2_C | Check Negative Difference Density on H17B        | -0.35   | eA-3   |
| PLAT978_ALERT_2_C | Number C-C Bonds with Positive Residual Density. | 0       | Info   |

---

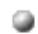

#### Alert level G

|                   |                                                  |     |        |
|-------------------|--------------------------------------------------|-----|--------|
| PLAT003_ALERT_2_G | Number of Uiso or Uij Restrained non-H Atoms ... | 50  | Report |
| PLAT187_ALERT_4_G | The CIF-Embedded .res File Contains RIGU Records | 1   | Report |
| PLAT860_ALERT_3_G | Number of Least-Squares Restraints .....         | 396 | Note   |
| PLAT910_ALERT_3_G | Missing # of FCF Reflection(s) Below Theta(Min). | 4   | Note   |
| PLAT912_ALERT_4_G | Missing # of FCF Reflections Above STh/L= 0.600  | 44  | Note   |
| PLAT913_ALERT_3_G | Missing # of Very Strong Reflections in FCF .... | 1   | Note   |

---

- 0 **ALERT level A** = Most likely a serious problem - resolve or explain  
0 **ALERT level B** = A potentially serious problem, consider carefully  
10 **ALERT level C** = Check. Ensure it is not caused by an omission or oversight  
6 **ALERT level G** = General information/check it is not something unexpected
- 3 ALERT type 1 CIF construction/syntax error, inconsistent or missing data  
5 ALERT type 2 Indicator that the structure model may be wrong or deficient  
6 ALERT type 3 Indicator that the structure quality may be low  
2 ALERT type 4 Improvement, methodology, query or suggestion  
0 ALERT type 5 Informative message, check
- 

## Datablock: 7

---

Bond precision: C-C = 0.0024 A

Wavelength=1.54184

Cell: a=16.30145(13) b=20.68971(16) c=16.01395(13)

alpha=90

beta=100.9135(8)

gamma=90

Temperature: 100 K

|                | Calculated         | Reported           |
|----------------|--------------------|--------------------|
| Volume         | 5303.38(7)         | 5303.38(7)         |
| Space group    | P 21/c             | P 1 21/c 1         |
| Hall group     | -P 2ybc            | -P 2ybc            |
| Moiety formula | C22 H50 Li N O Si2 | C22 H50 Li N O Si2 |
| Sum formula    | C22 H50 Li N O Si2 | C22 H50 Li N O Si2 |
| Mr             | 407.75             | 407.75             |
| Dx,g cm-3      | 1.021              | 1.021              |
| Z              | 8                  | 8                  |
| Mu (mm-1)      | 1.272              | 1.272              |
| F000           | 1824.0             | 1824.0             |
| F000'          | 1831.66            |                    |
| h,k,lmax       | 19,24,19           | 19,24,19           |
| Nref           | 9708               | 9689               |
| Tmin,Tmax      | 0.738,0.835        | 0.492,1.000        |
| Tmin'          | 0.570              |                    |

Correction method= # Reported T Limits: Tmin=0.492 Tmax=1.000  
AbsCorr = GAUSSIAN

Data completeness= 0.998                      Theta(max)= 68.247

R(reflections)= 0.0395( 8531)              wR2(reflections)= 0.1080( 9689)

S = 1.048                      Npar= 528

The following ALERTS were generated. Each ALERT has the format

**test-name\_ALERT\_alert-type\_alert-level.**

Click on the hyperlinks for more details of the test.

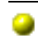

#### Alert level C

|                   |                                                  |            |
|-------------------|--------------------------------------------------|------------|
| PLAT220_ALERT_2_C | Non-Solvent Resd 2 C Ueq(max)/Ueq(min) Range     | 4.0 Ratio  |
| PLAT241_ALERT_2_C | High 'MainMol' Ueq as Compared to Neighbors of   | Li1 Check  |
| PLAT241_ALERT_2_C | High 'MainMol' Ueq as Compared to Neighbors of   | C42 Check  |
| PLAT242_ALERT_2_C | Low 'MainMol' Ueq as Compared to Neighbors of    | C41 Check  |
| PLAT412_ALERT_2_C | Short Intra XH3 .. XHn H18A ..H10B               | 1.88 Ang.  |
| PLAT911_ALERT_3_C | Missing FCF Refl Between Thmin & STh/L= 0.600    | 14 Report  |
| PLAT977_ALERT_2_C | Check Negative Difference Density on H42B        | -0.36 eA-3 |
| PLAT977_ALERT_2_C | Check Negative Difference Density on H43A        | -0.36 eA-3 |
| PLAT978_ALERT_2_C | Number C-C Bonds with Positive Residual Density. | 0 Info     |

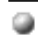

#### Alert level G

|                   |                                                  |              |
|-------------------|--------------------------------------------------|--------------|
| PLAT002_ALERT_2_G | Number of Distance or Angle Restraints on AtSite | 5 Note       |
| PLAT003_ALERT_2_G | Number of Uiso or Uij Restrained non-H Atoms ... | 56 Report    |
| PLAT142_ALERT_4_G | s.u. on b - Axis Small or Missing .....          | 0.00016 Ang. |
| PLAT143_ALERT_4_G | s.u. on c - Axis Small or Missing .....          | 0.00013 Ang. |
| PLAT176_ALERT_4_G | The CIF-Embedded .res File Contains SADI Records | 2 Report     |
| PLAT187_ALERT_4_G | The CIF-Embedded .res File Contains RIGU Records | 1 Report     |
| PLAT301_ALERT_3_G | Main Residue Disorder .....(Resd 1 )             | 7% Note      |
| PLAT860_ALERT_3_G | Number of Least-Squares Restraints .....         | 408 Note     |
| PLAT912_ALERT_4_G | Missing # of FCF Reflections Above STh/L= 0.600  | 6 Note       |

---

0 **ALERT level A** = Most likely a serious problem - resolve or explain  
 0 **ALERT level B** = A potentially serious problem, consider carefully  
 9 **ALERT level C** = Check. Ensure it is not caused by an omission or oversight  
 10 **ALERT level G** = General information/check it is not something unexpected

0 ALERT type 1 CIF construction/syntax error, inconsistent or missing data  
 10 ALERT type 2 Indicator that the structure model may be wrong or deficient  
 4 ALERT type 3 Indicator that the structure quality may be low  
 5 ALERT type 4 Improvement, methodology, query or suggestion  
 0 ALERT type 5 Informative message, check

---

## Datablock: 8

---

Bond precision: C-C = 0.0044 A

Wavelength=0.71073

Cell: a=10.5111(5) b=15.9508(6) c=18.7477(10)  
 alpha=85.086(4) beta=84.850(4) gamma=83.646(4)  
 Temperature: 150 K

|                | Calculated          | Reported            |
|----------------|---------------------|---------------------|
| Volume         | 3102.2(3)           | 3102.2(3)           |
| Space group    | P -1                | P -1                |
| Hall group     | -P 1                | -P 1                |
| Moiety formula | C26 H58 Li N O2 Si2 | C26 H58 Li N O2 Si2 |
| Sum formula    | C26 H58 Li N O2 Si2 | C26 H58 Li N O2 Si2 |
| Mr             | 479.85              | 479.85              |
| Dx,g cm-3      | 1.027               | 1.027               |
| Z              | 4                   | 4                   |
| Mu (mm-1)      | 0.134               | 0.134               |
| F000           | 1072.0              | 1072.0              |
| F000'          | 1072.96             |                     |
| h,k,lmax       | 12,19,22            | 12,19,22            |
| Nref           | 11366               | 11272               |
| Tmin,Tmax      | 0.944,0.971         | 0.881,0.933         |
| Tmin'          | 0.944               |                     |

Correction method= # Reported T Limits: Tmin=0.881 Tmax=0.933  
 AbsCorr = ANALYTICAL

Data completeness= 0.992

Theta(max)= 25.350

R(reflections)= 0.0576( 8029)

wR2(reflections)= 0.1545( 11272)

S = 1.025

Npar= 676

---

The following ALERTS were generated. Each ALERT has the format

**test-name\_ALERT\_alert-type\_alert-level.**

Click on the hyperlinks for more details of the test.

---

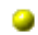

### Alert level C

|                   |                                                  |                                           |         |        |
|-------------------|--------------------------------------------------|-------------------------------------------|---------|--------|
| PLAT241_ALERT_2_C | High                                             | 'MainMol' Ueq as Compared to Neighbors of | C38     | Check  |
| PLAT242_ALERT_2_C | Low                                              | 'MainMol' Ueq as Compared to Neighbors of | C37     | Check  |
| PLAT313_ALERT_2_C | Oxygen with Three Covalent Bonds (rare)          | .....                                     | 03      | Check  |
| PLAT313_ALERT_2_C | Oxygen with Three Covalent Bonds (rare)          | .....                                     | 04      | Check  |
| PLAT313_ALERT_2_C | Oxygen with Three Covalent Bonds (rare)          | .....                                     | 02      | Check  |
| PLAT340_ALERT_3_C | Low Bond Precision on                            | C-C Bonds .....                           | 0.00445 | Ang.   |
| PLAT910_ALERT_3_C | Missing # of FCF Reflection(s) Below Theta(Min). |                                           | 10      | Note   |
| PLAT911_ALERT_3_C | Missing FCF Refl Between Thmin & STh/L=          | 0.600                                     | 80      | Report |

---

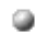

### Alert level G

|                   |                                                  |           |       |        |
|-------------------|--------------------------------------------------|-----------|-------|--------|
| PLAT002_ALERT_2_G | Number of Distance or Angle Restraints on AtSite |           | 19    | Note   |
| PLAT003_ALERT_2_G | Number of Uiso or Uij Restrained non-H Atoms ... |           | 72    | Report |
| PLAT154_ALERT_1_G | The s.u.'s on the Cell Angles are Equal ..(Note) |           | 0.004 | Degree |
| PLAT176_ALERT_4_G | The CIF-Embedded .res File Contains SADI Records |           | 3     | Report |
| PLAT187_ALERT_4_G | The CIF-Embedded .res File Contains RIGU Records |           | 1     | Report |
| PLAT301_ALERT_3_G | Main Residue Disorder .....                      | (Resd 1 ) | 22%   | Note   |
| PLAT301_ALERT_3_G | Main Residue Disorder .....                      | (Resd 2 ) | 3%    | Note   |
| PLAT860_ALERT_3_G | Number of Least-Squares Restraints .....         |           | 600   | Note   |
| PLAT912_ALERT_4_G | Missing # of FCF Reflections Above STh/L=        | 0.600     | 6     | Note   |
| PLAT978_ALERT_2_G | Number C-C Bonds with Positive Residual Density. |           | 2     | Info   |

---

- 0 **ALERT level A** = Most likely a serious problem - resolve or explain  
0 **ALERT level B** = A potentially serious problem, consider carefully  
8 **ALERT level C** = Check. Ensure it is not caused by an omission or oversight  
10 **ALERT level G** = General information/check it is not something unexpected
- 1 ALERT type 1 CIF construction/syntax error, inconsistent or missing data  
8 ALERT type 2 Indicator that the structure model may be wrong or deficient  
6 ALERT type 3 Indicator that the structure quality may be low  
3 ALERT type 4 Improvement, methodology, query or suggestion  
0 ALERT type 5 Informative message, check
- 

## Datablock: 9-THF

---

Bond precision: C-C = 0.0045 A

Wavelength=0.71073

Cell: a=9.9185(9) b=10.8375(7) c=11.0792(7)  
alpha=98.833(5) beta=103.526(6) gamma=109.936(7)  
Temperature: 150 K

|                | Calculated            | Reported              |
|----------------|-----------------------|-----------------------|
| Volume         | 1052.45(15)           | 1052.44(14)           |
| Space group    | P -1                  | P -1                  |
| Hall group     | -P 1                  | -P 1                  |
| Moiety formula | C32 H76 N2 Na2 O2 Si4 | C32 H76 N2 Na2 O2 Si4 |
| Sum formula    | C32 H76 N2 Na2 O2 Si4 | C32 H76 N2 Na2 O2 Si4 |
| Mr             | 679.29                | 679.28                |
| Dx,g cm-3      | 1.072                 | 1.072                 |
| Z              | 1                     | 1                     |
| Mu (mm-1)      | 0.189                 | 0.189                 |
| F000           | 376.0                 | 376.0                 |
| F000'          | 376.47                |                       |
| h,k,lmax       | 12,13,13              | 12,13,13              |
| Nref           | 4334                  | 4318                  |
| Tmin,Tmax      | 0.912,0.973           | 0.316,1.000           |
| Tmin'          | 0.903                 |                       |

Correction method= # Reported T Limits: Tmin=0.316 Tmax=1.000  
AbsCorr = GAUSSIAN

Data completeness= 0.996                      Theta(max)= 26.420

R(reflections)= 0.0594( 3108)              wR2(reflections)= 0.1561( 4318)

S = 1.029                                      Npar= 250

The following ALERTS were generated. Each ALERT has the format

**test-name\_ALERT\_alert-type\_alert-level.**

Click on the hyperlinks for more details of the test.

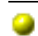

#### Alert level C

|                                                               |              |
|---------------------------------------------------------------|--------------|
| PLAT340_ALERT_3_C Low Bond Precision on C-C Bonds .....       | 0.0045 Ang.  |
| PLAT921_ALERT_1_C R1 in the CIF and FCF Differ by .....       | 0.0020 Check |
| PLAT922_ALERT_1_C wR2 in the CIF and FCF Differ by .....      | 0.0042 Check |
| PLAT923_ALERT_1_C S Values in the CIF and FCF Differ by ..... | 0.029 Check  |

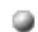

#### Alert level G

|                                                                    |           |
|--------------------------------------------------------------------|-----------|
| PLAT002_ALERT_2_G Number of Distance or Angle Restraints on AtSite | 17 Note   |
| PLAT003_ALERT_2_G Number of Uiso or Uij Restrained non-H Atoms ... | 26 Report |
| PLAT176_ALERT_4_G The CIF-Embedded .res File Contains SADI Records | 3 Report  |
| PLAT187_ALERT_4_G The CIF-Embedded .res File Contains RIGU Records | 1 Report  |
| PLAT301_ALERT_3_G Main Residue Disorder .....(Resd 1 )             | 24% Note  |
| PLAT720_ALERT_4_G Number of Unusual/Non-Standard Labels .....      | 12 Note   |
| PLAT860_ALERT_3_G Number of Least-Squares Restraints .....         | 235 Note  |
| PLAT910_ALERT_3_G Missing # of FCF Reflection(s) Below Theta(Min). | 2 Note    |
| PLAT912_ALERT_4_G Missing # of FCF Reflections Above STh/L= 0.600  | 13 Note   |
| PLAT978_ALERT_2_G Number C-C Bonds with Positive Residual Density. | 1 Info    |

0 **ALERT level A** = Most likely a serious problem - resolve or explain

0 **ALERT level B** = A potentially serious problem, consider carefully

4 **ALERT level C** = Check. Ensure it is not caused by an omission or oversight  
10 **ALERT level G** = General information/check it is not something unexpected

3 **ALERT type 1** CIF construction/syntax error, inconsistent or missing data  
3 **ALERT type 2** Indicator that the structure model may be wrong or deficient  
4 **ALERT type 3** Indicator that the structure quality may be low  
4 **ALERT type 4** Improvement, methodology, query or suggestion  
0 **ALERT type 5** Informative message, check

---

## Datablock: 10

---

Bond precision: C-C = 0.0024 Å Wavelength=1.54184

Cell: a=18.2177(3) b=9.00185(10) c=17.2035(2)  
alpha=90 beta=95.3841(12) gamma=90

Temperature: 150 K

|                        | Calculated              | Reported         |
|------------------------|-------------------------|------------------|
| Volume                 | 2808.81(6)              | 2808.80(6)       |
| Space group            | P 21/c                  | P 1 21/c 1       |
| Hall group             | -P 2ybc                 | -P 2ybc          |
| Moiety formula         | C18 H42 N Na Si2, C7 H8 | C25 H50 N Na Si2 |
| Sum formula            | C25 H50 N Na Si2        | C25 H50 N Na Si2 |
| Mr                     | 443.83                  | 443.83           |
| Dx, g cm <sup>-3</sup> | 1.050                   | 1.050            |
| Z                      | 4                       | 4                |
| Mu (mm <sup>-1</sup> ) | 1.358                   | 1.358            |
| F000                   | 984.0                   | 984.0            |
| F000'                  | 988.36                  |                  |
| h,k,lmax               | 21,10,20                | 21,10,20         |
| Nref                   | 5147                    | 5057             |
| Tmin,Tmax              | 0.850,0.873             | 0.514,1.000      |
| Tmin'                  | 0.762                   |                  |

Correction method= # Reported T Limits: Tmin=0.514 Tmax=1.000  
AbsCorr = MULTI-SCAN

Data completeness= 0.983 Theta(max)= 68.221

R(reflections)= 0.0363( 4482) wR2(reflections)= 0.1030( 5057)

S = 1.044 Npar= 275

---

The following ALERTS were generated. Each ALERT has the format  
**test-name\_ALERT\_alert-type\_alert-level**.  
Click on the hyperlinks for more details of the test.

---

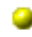 **Alert level C**

|                                                                  |           |
|------------------------------------------------------------------|-----------|
| PLAT241_ALERT_2_C High 'MainMol' Ueq as Compared to Neighbors of | Nal Check |
| PLAT911_ALERT_3_C Missing FCF Refl Between Thmin & STh/L= 0.600  | 73 Report |

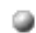

### Alert level G

|                                                                    |              |
|--------------------------------------------------------------------|--------------|
| PLAT042_ALERT_1_G Calc. and Reported MoietyFormula Strings Differ  | Please Check |
| PLAT764_ALERT_4_G Overcomplete CIF Bond List Detected (Rep/Expd) . | 1.20 Ratio   |
| PLAT910_ALERT_3_G Missing # of FCF Reflection(s) Below Theta(Min). | 2 Note       |
| PLAT912_ALERT_4_G Missing # of FCF Reflections Above STh/L= 0.600  | 15 Note      |
| PLAT978_ALERT_2_G Number C-C Bonds with Positive Residual Density. | 10 Info      |

---

0 **ALERT level A** = Most likely a serious problem - resolve or explain  
0 **ALERT level B** = A potentially serious problem, consider carefully  
2 **ALERT level C** = Check. Ensure it is not caused by an omission or oversight  
5 **ALERT level G** = General information/check it is not something unexpected

1 ALERT type 1 CIF construction/syntax error, inconsistent or missing data  
2 ALERT type 2 Indicator that the structure model may be wrong or deficient  
2 ALERT type 3 Indicator that the structure quality may be low  
2 ALERT type 4 Improvement, methodology, query or suggestion  
0 ALERT type 5 Informative message, check

---

It is advisable to attempt to resolve as many as possible of the alerts in all categories. Often the minor alerts point to easily fixed oversights, errors and omissions in your CIF or refinement strategy, so attention to these fine details can be worthwhile. In order to resolve some of the more serious problems it may be necessary to carry out additional measurements or structure refinements. However, the purpose of your study may justify the reported deviations and the more serious of these should normally be commented upon in the discussion or experimental section of a paper or in the "special\_details" fields of the CIF. checkCIF was carefully designed to identify outliers and unusual parameters, but every test has its limitations and alerts that are not important in a particular case may appear. Conversely, the absence of alerts does not guarantee there are no aspects of the results needing attention. It is up to the individual to critically assess their own results and, if necessary, seek expert advice.

### Publication of your CIF in IUCr journals

A basic structural check has been run on your CIF. These basic checks will be run on all CIFs submitted for publication in IUCr journals (*Acta Crystallographica*, *Journal of Applied Crystallography*, *Journal of Synchrotron Radiation*); however, if you intend to submit to *Acta Crystallographica Section C* or *E* or *IUCrData*, you should make sure that full publication checks are run on the final version of your CIF prior to submission.

### Publication of your CIF in other journals

Please refer to the *Notes for Authors* of the relevant journal for any special instructions relating to CIF submission.

---

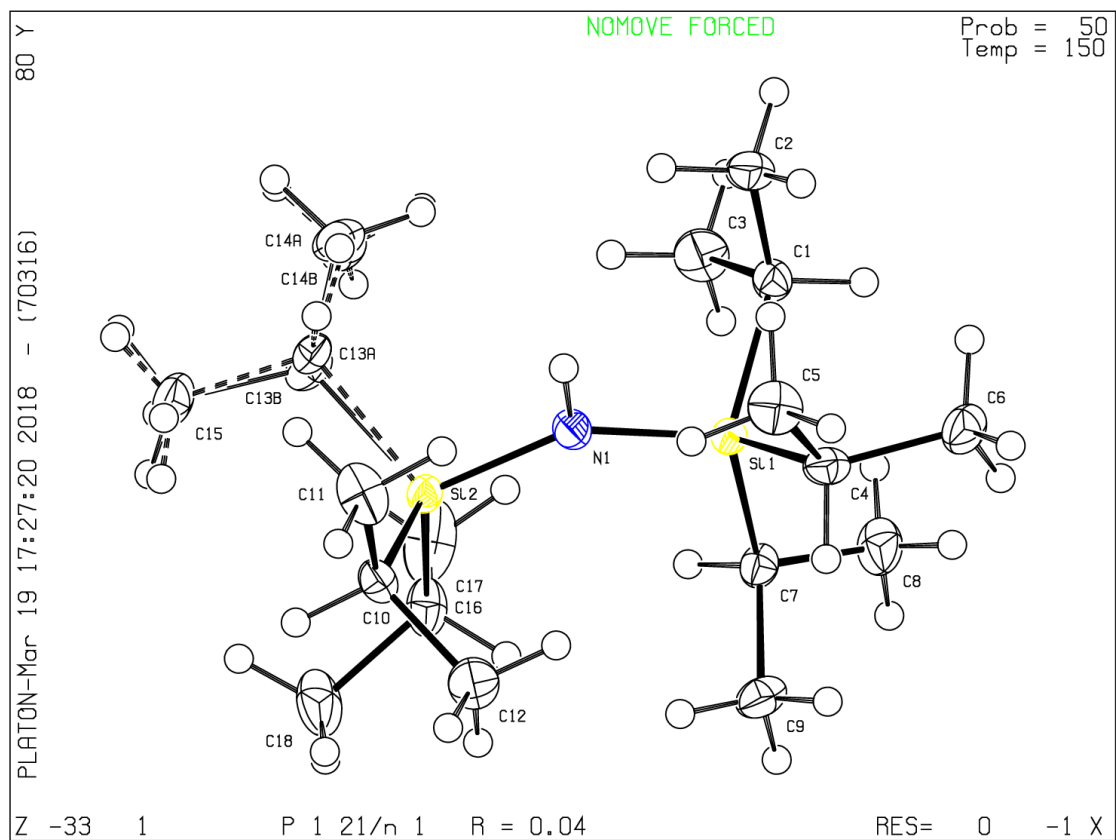

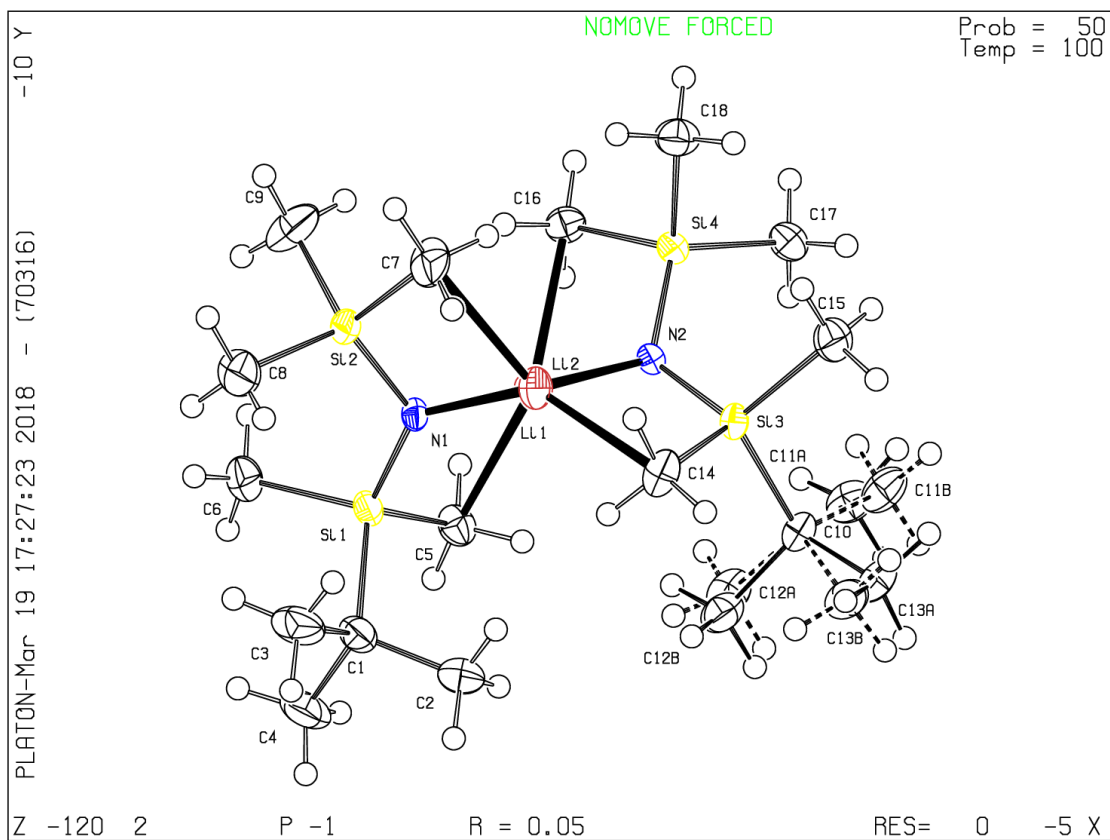

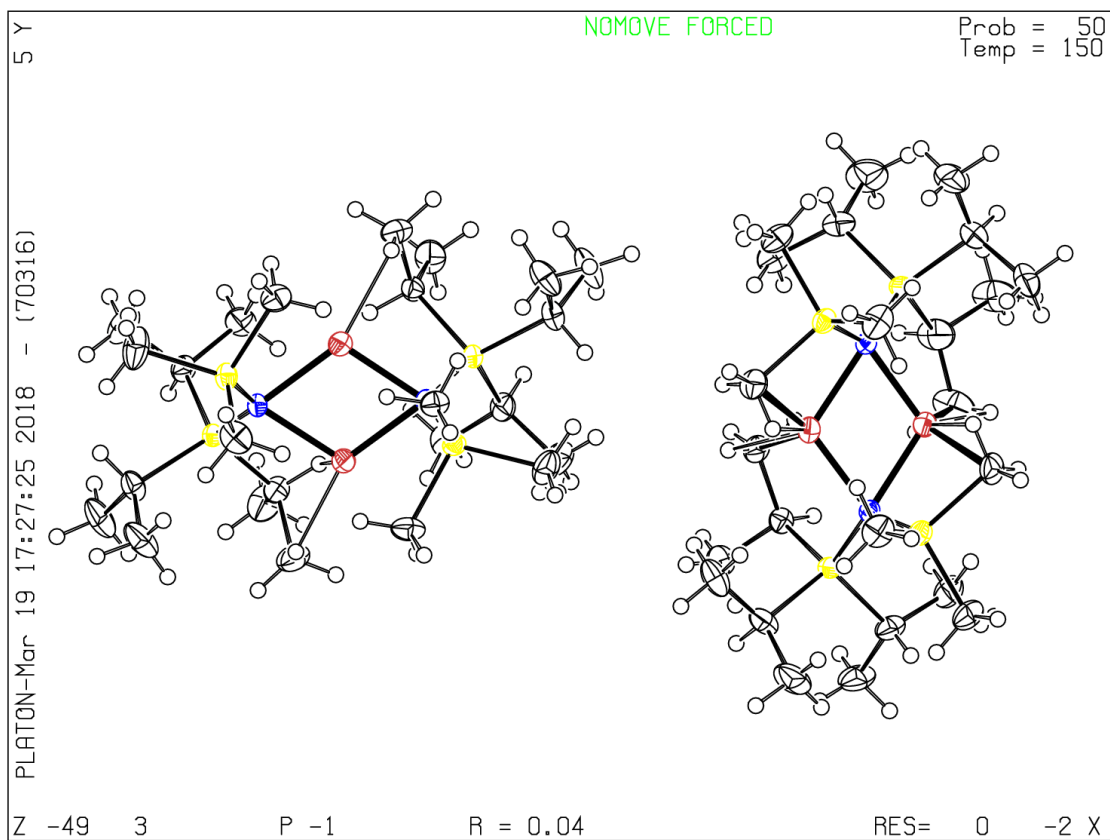

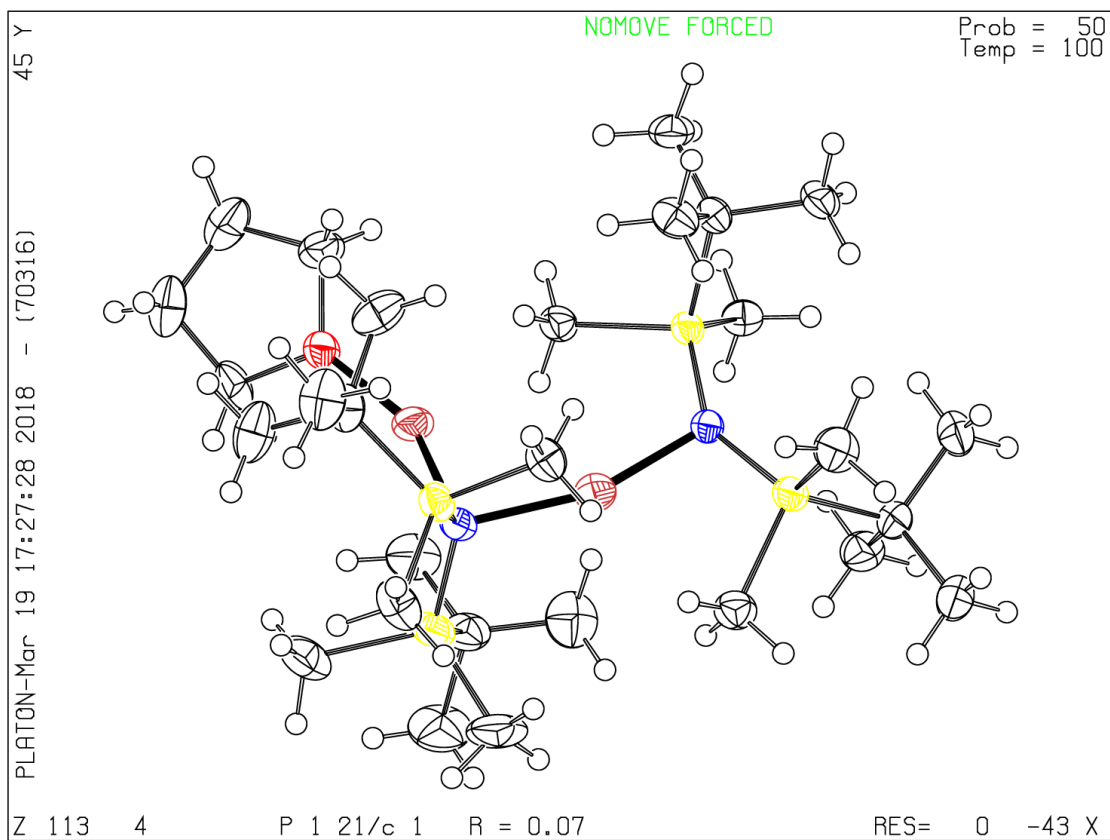

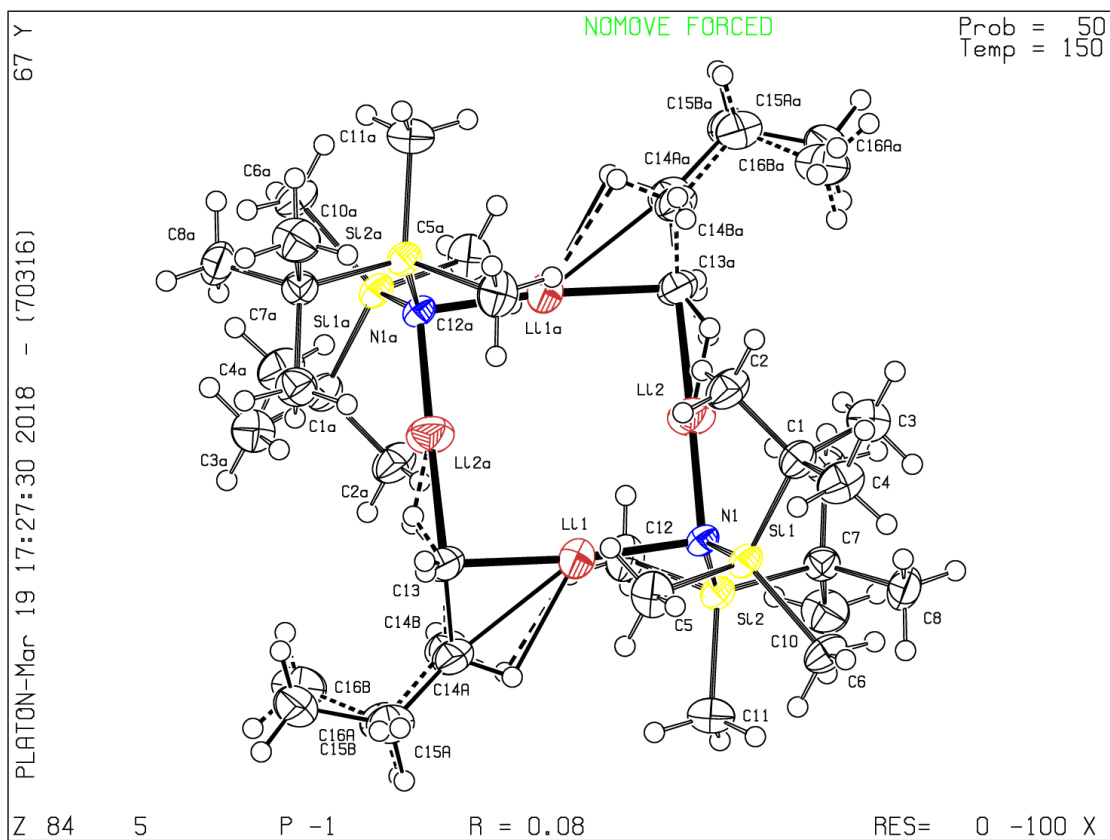

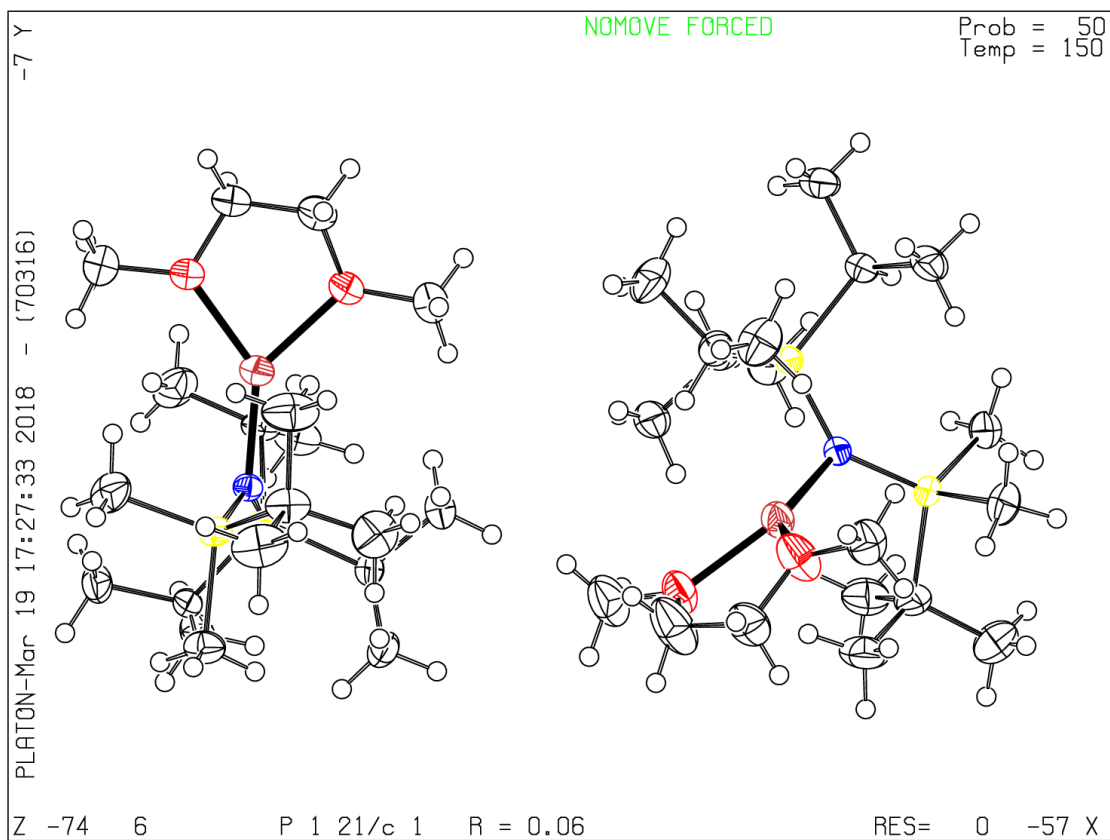

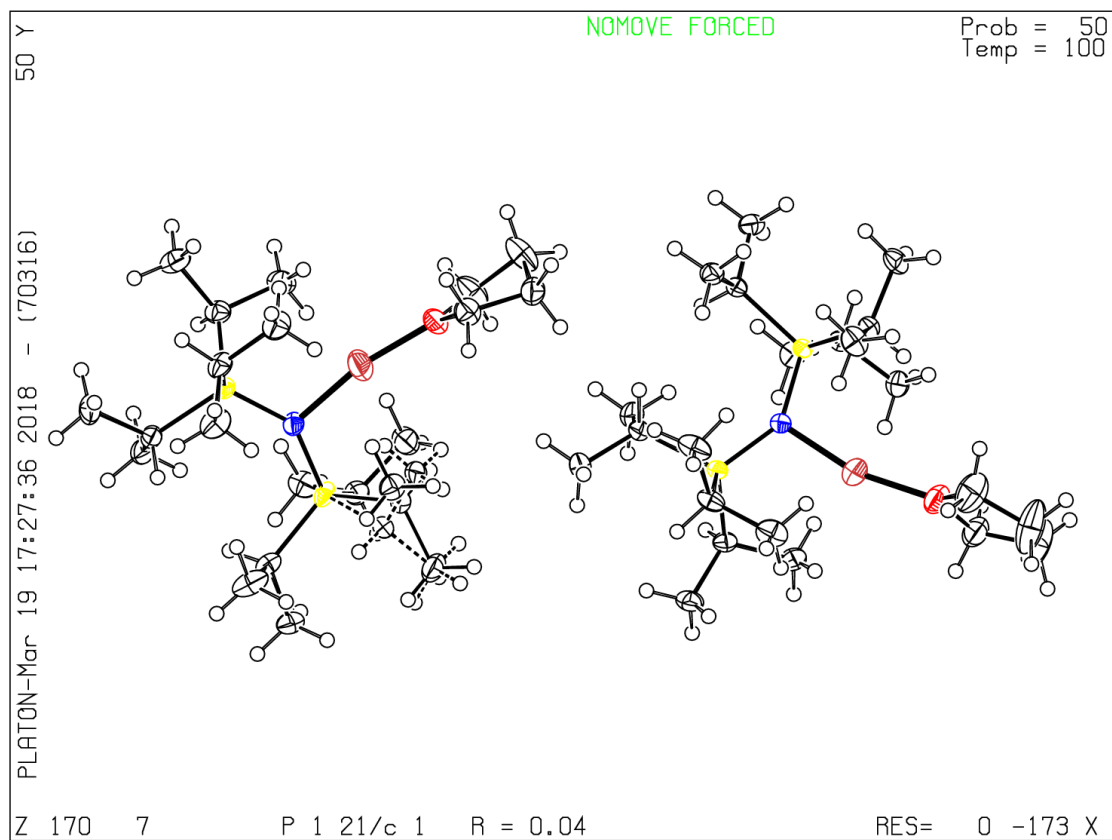

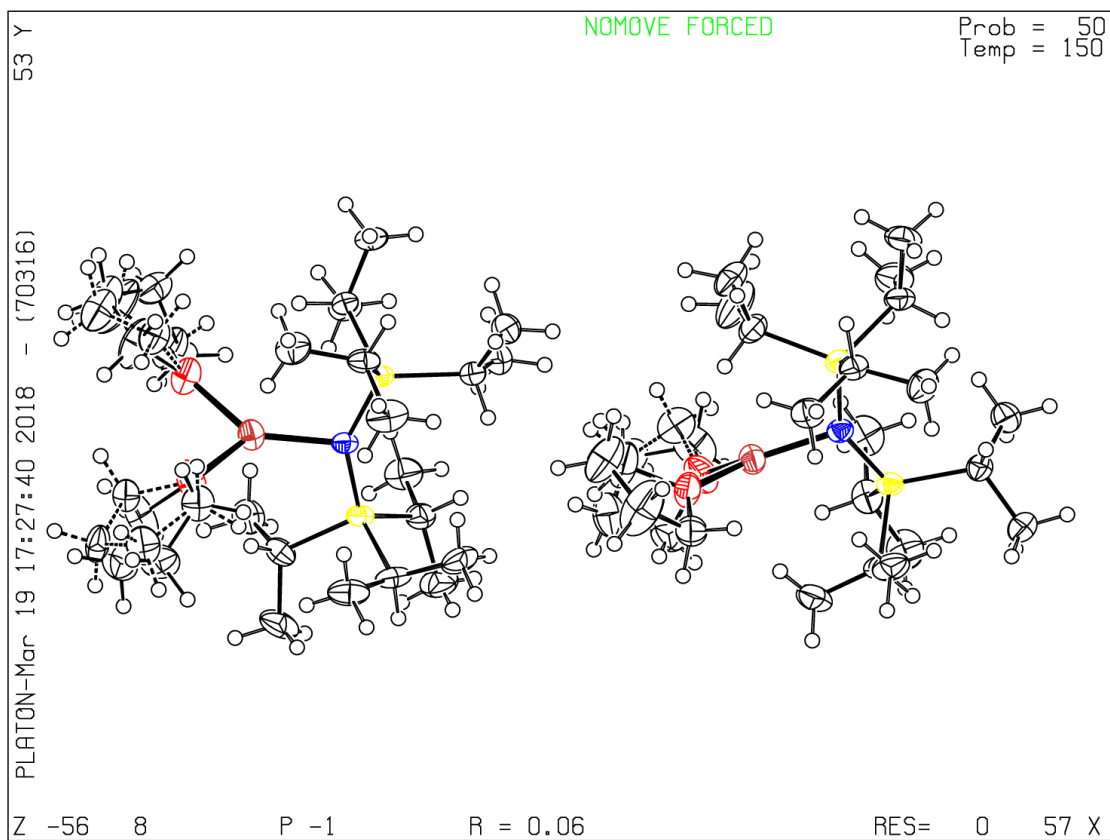

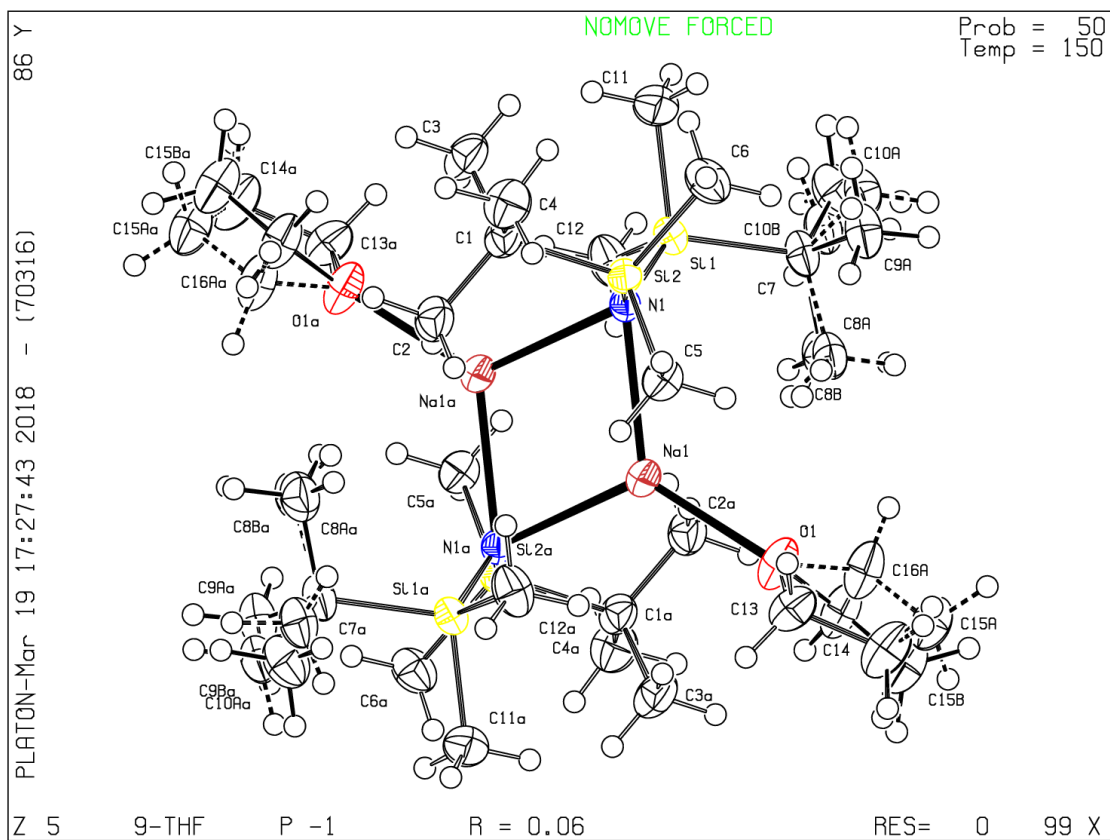

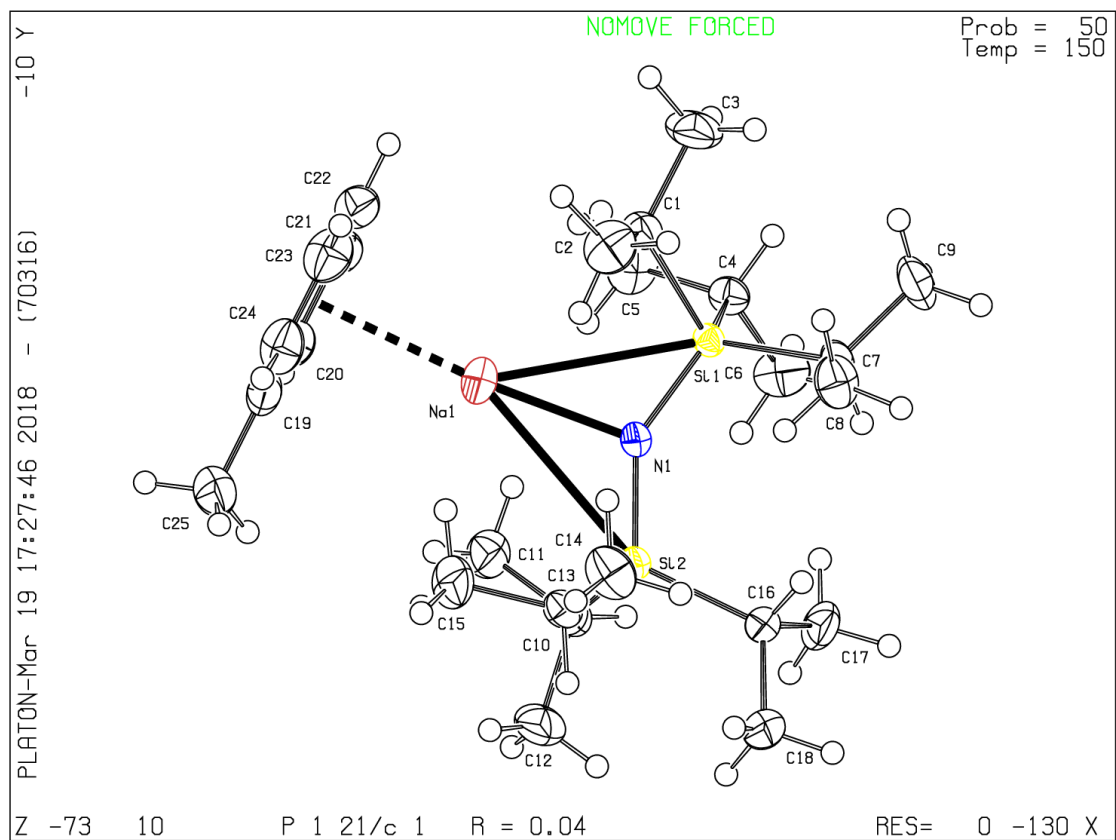

Supplement: s1 [file s1]
