# Supplementary material for: Structural Characterization of Lithium and Sodium Bulky Bis(silyl)amide Complexes
Source: MDPI journal article supplement (doi:10.3390/molecules23051138), 2018-05-10
Supplement: s1 [file s1]

# **Structural Characterization of Lithium and Sodium Bulky Bis(silyl)amide Complexes**

**Hannah M. Nicholas<sup>1</sup>, Conrad A. P. Goodwin<sup>1</sup>, Jon G. C. Kragoskow<sup>1</sup>, Selena J. Lockyer<sup>1</sup>, and David P. Mills<sup>1\*</sup>**

<sup>1</sup> School of Chemistry, The University of Manchester, Oxford Road, Manchester, M13 9PL, U.K.;  
hannah.nicholas@manchester.ac.uk; conrad.goodwin@manchester.ac.uk;  
jon.kragoskow@student.manchester.ac.uk; selena.lockyer@postgrad.manchester.ac.uk

\* Correspondence: david.mills@manchester.ac.uk; Tel.: +44-161-275-4606

## **Contents**

|                                 |            |
|---------------------------------|------------|
| <b>1. NMR spectra</b>           | <b>S2</b>  |
| <b>2. FTIR spectra</b>          | <b>S13</b> |
| <b>3. X-ray crystallography</b> | <b>S16</b> |
| <b>4. References</b>            | <b>S22</b> |

## 1. NMR spectra

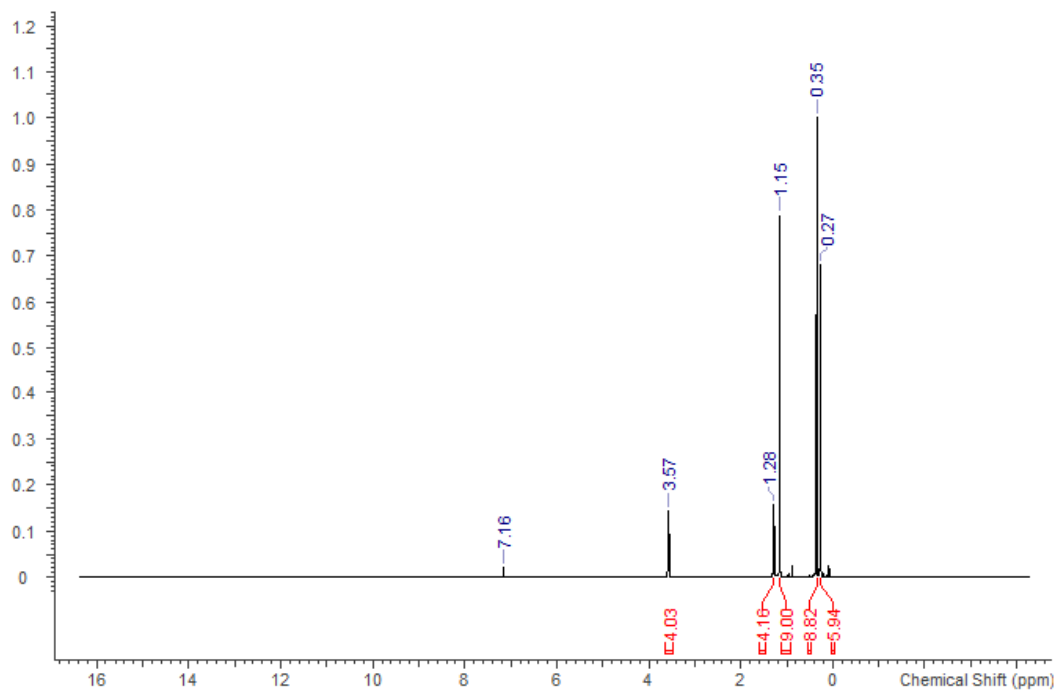

**Figure S1.**  $^1\text{H}$  NMR spectrum of  $[\text{Li}\{\mu\text{-N}(\text{Si}^t\text{BuMe}_2)(\text{SiMe}_3)\}(\text{THF})]_n$  (2 □ THF) in  $\text{C}_6\text{D}_6$ .

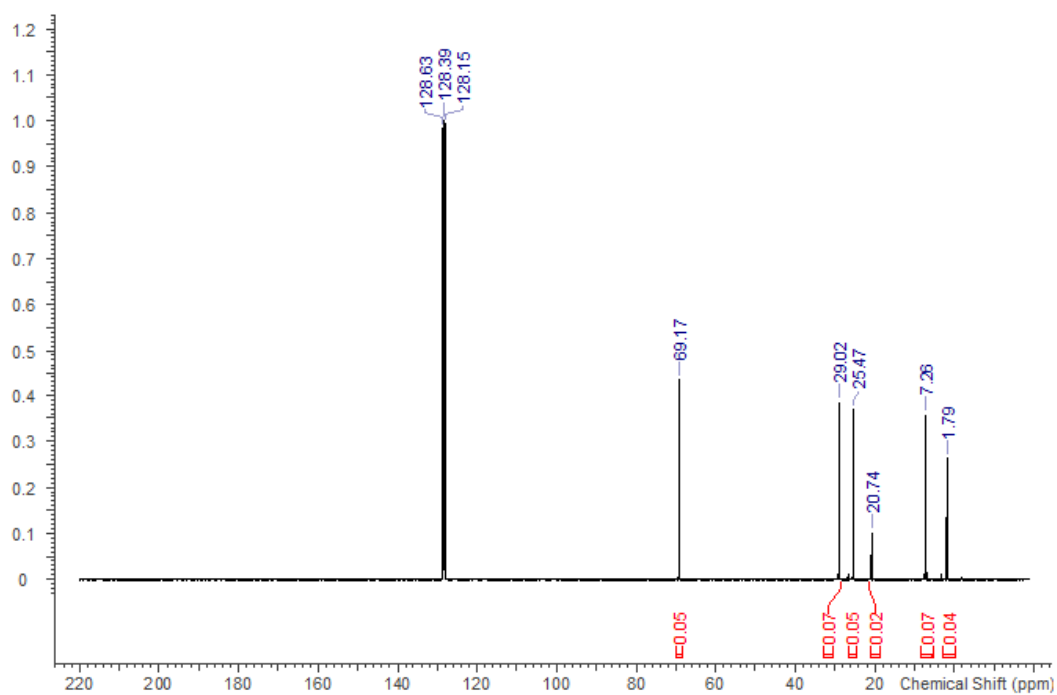

**Figure S2.**  $^{13}\text{C}\{^1\text{H}\}$  NMR spectrum of  $[\text{Li}\{\mu\text{-N}(\text{Si}^t\text{BuMe}_2)(\text{SiMe}_3)\}(\text{THF})]_n$  (2 □ THF) in  $\text{C}_6\text{D}_6$ .

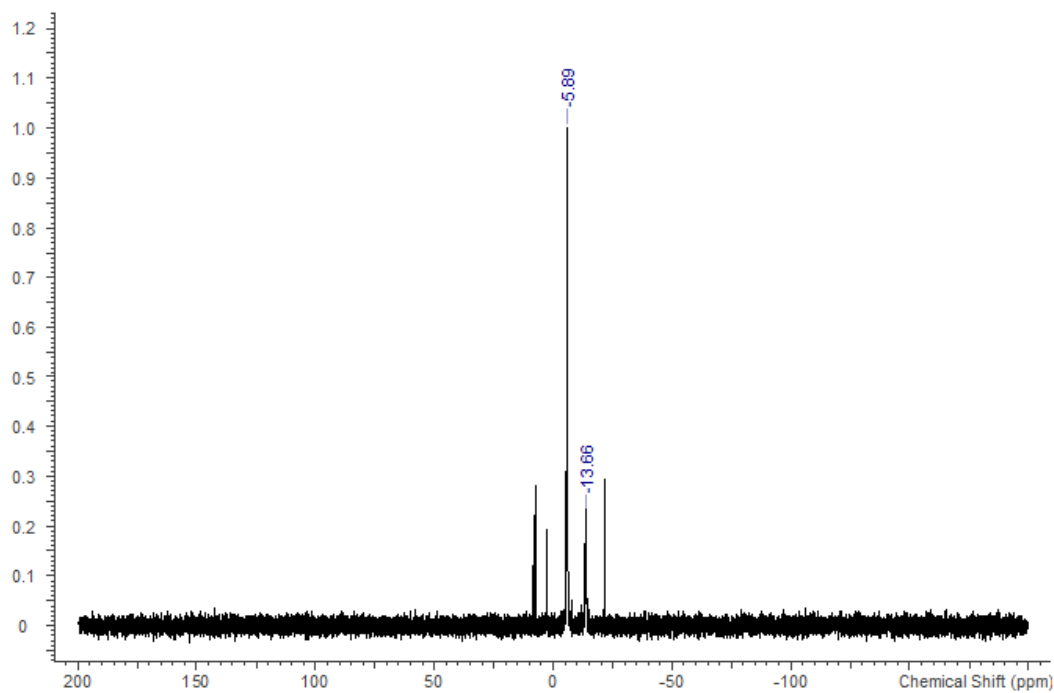

**Figure S3.**  $^{29}\text{Si}\{^1\text{H}\}$  NMR spectrum of  $[\text{Li}\{\mu\text{-N}(\text{Si}^t\text{BuMe}_2)(\text{SiMe}_3)\}(\text{THF})]_n$  (**2** □ **THF**) in  $\text{C}_6\text{D}_6$ .

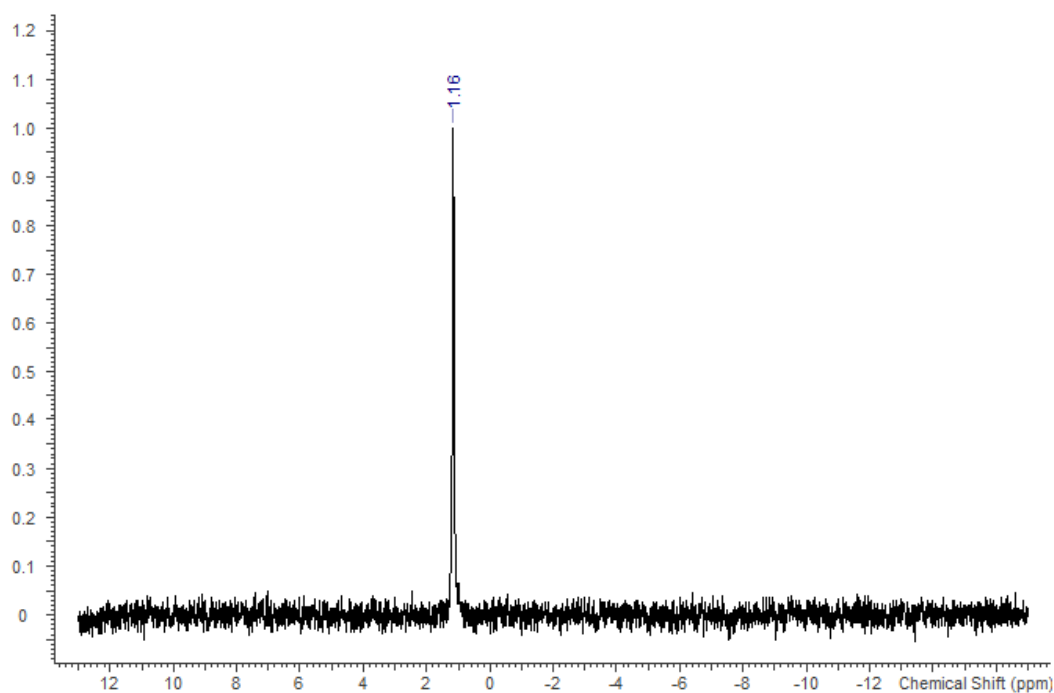

**Figure S4.**  $^7\text{Li}\{^1\text{H}\}$  NMR spectrum of  $[\text{Li}\{\mu\text{-N}(\text{Si}^t\text{BuMe}_2)(\text{SiMe}_3)\}(\text{THF})]_n$  (**2** □ **THF**) in  $\text{C}_6\text{D}_6$ .

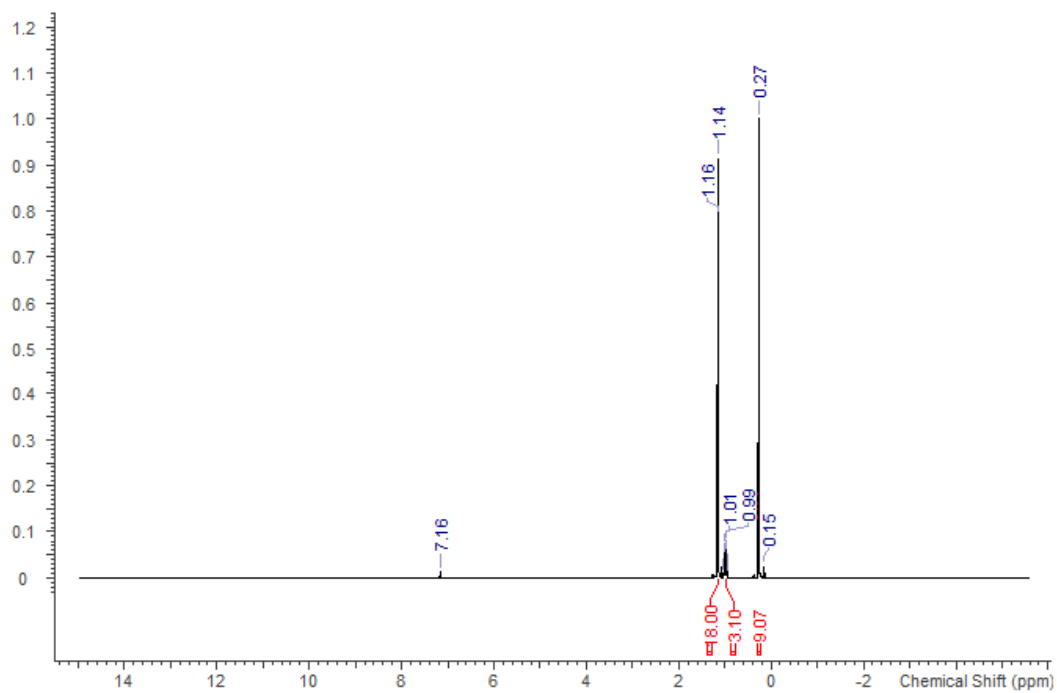

**Figure S5.** <sup>1</sup>H NMR spectrum of [Li{μ-N(Si<sup>i</sup>Pr<sub>3</sub>)(SiMe<sub>3</sub>)}]<sub>2</sub> (3) in C<sub>6</sub>D<sub>6</sub>.

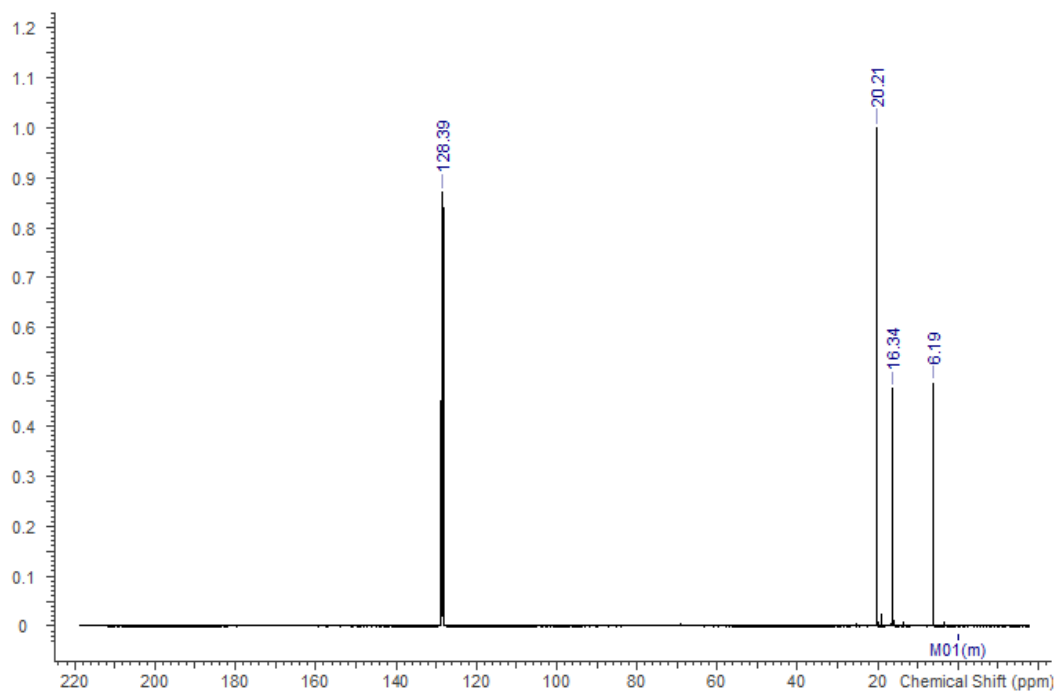

**Figure S6.** <sup>13</sup>C{<sup>1</sup>H} NMR spectrum of [Li{μ-N(Si<sup>i</sup>Pr<sub>3</sub>)(SiMe<sub>3</sub>)}]<sub>2</sub> (3) in C<sub>6</sub>D<sub>6</sub>.

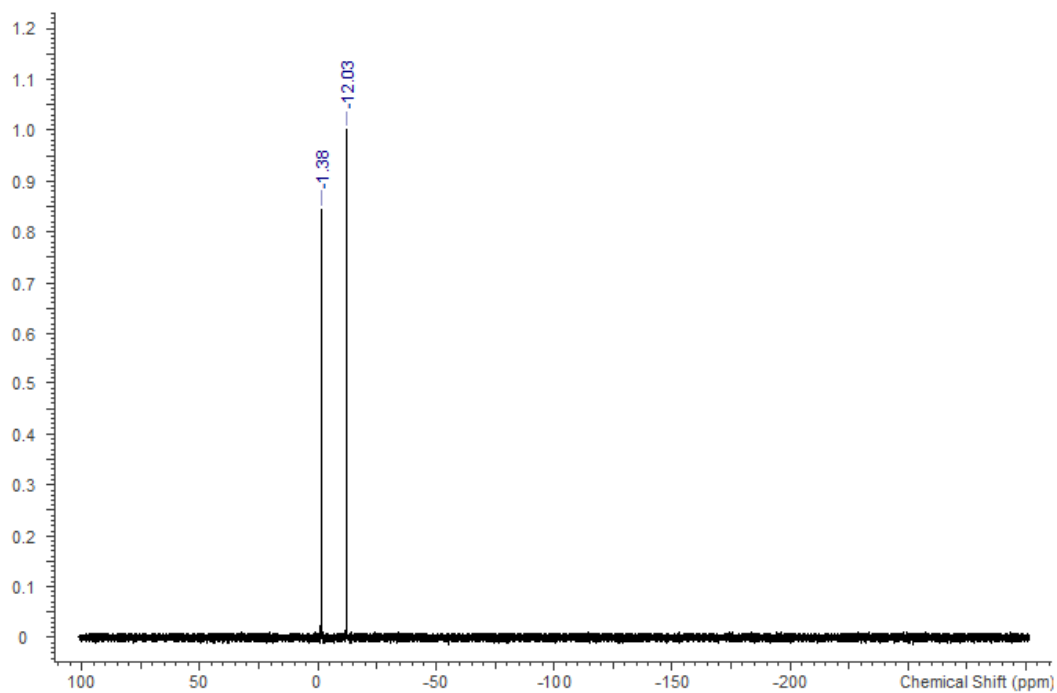

**Figure S7.**  $^{29}\text{Si}\{^1\text{H}\}$  NMR spectrum of  $[\text{Li}\{\mu\text{-N}(\text{Si}^i\text{Pr}_3)(\text{SiMe}_3)\}]_2$  (**3**) in  $\text{C}_6\text{D}_6$ .

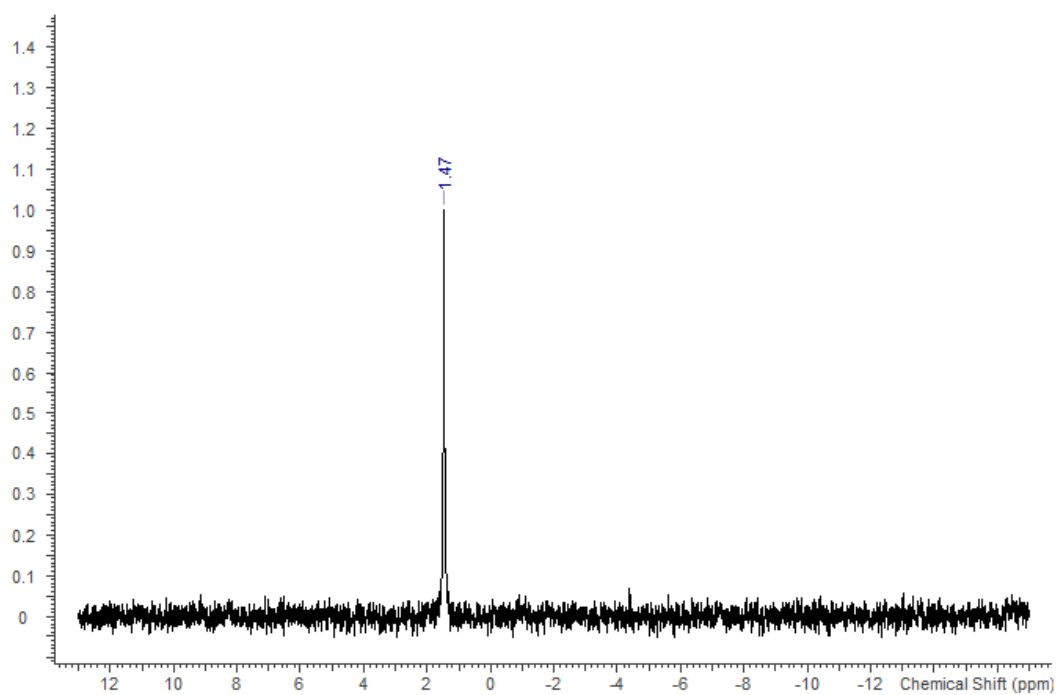

**Figure S8.**  $^7\text{Li}\{^1\text{H}\}$  NMR spectrum of  $[\text{Li}\{\mu\text{-N}(\text{Si}^i\text{Pr}_3)(\text{SiMe}_3)\}]_2$  (**3**) in  $\text{C}_6\text{D}_6$ .

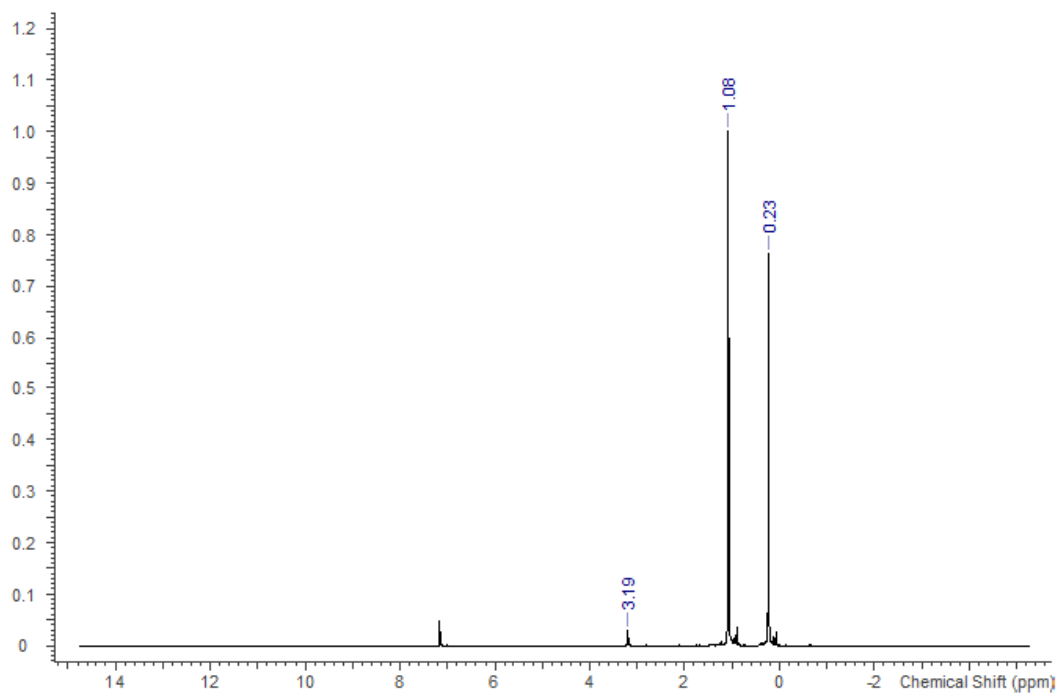

**Figure S9.**  $^1\text{H}$  NMR spectrum of  $[\text{Li}\{\text{N}(\text{Si}^t\text{BuMe}_2)_2\}\{\mu\text{-N}(\text{Si}^t\text{BuMe}_2)_2\}\text{Li}(\text{THF})]$  (**4**) in  $\text{C}_6\text{D}_6$ .

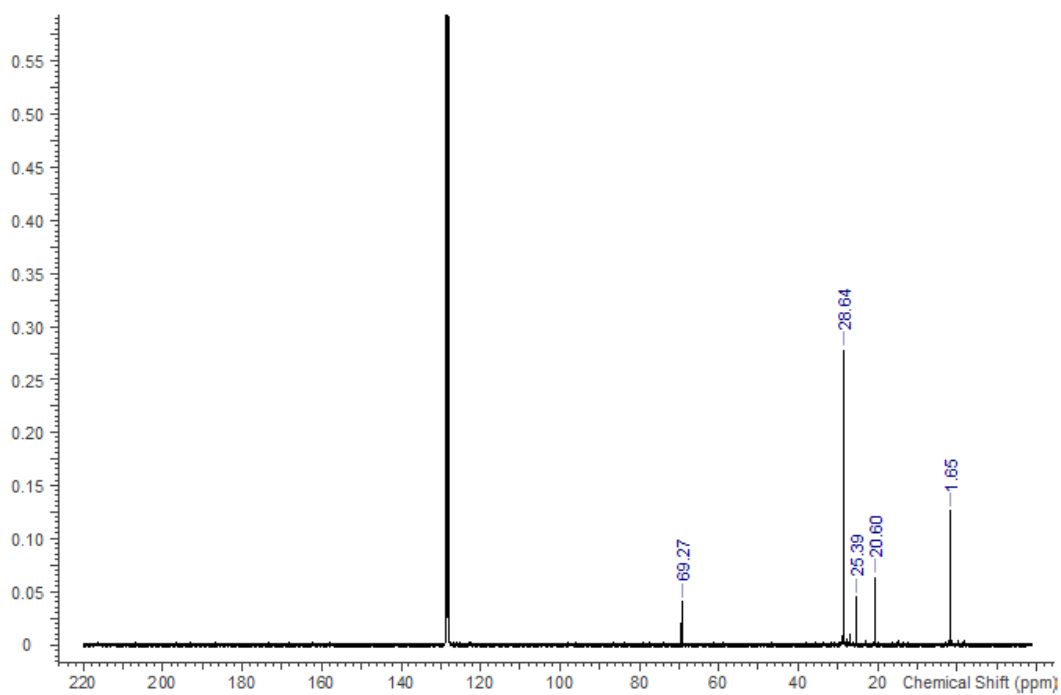

**Figure S10.**  $^{13}\text{C}\{^1\text{H}\}$  NMR spectrum of  $[\text{Li}\{\text{N}(\text{Si}^t\text{BuMe}_2)_2\}\{\mu\text{-N}(\text{Si}^t\text{BuMe}_2)_2\}\text{Li}(\text{THF})]$  (**4**) in  $\text{C}_6\text{D}_6$ .

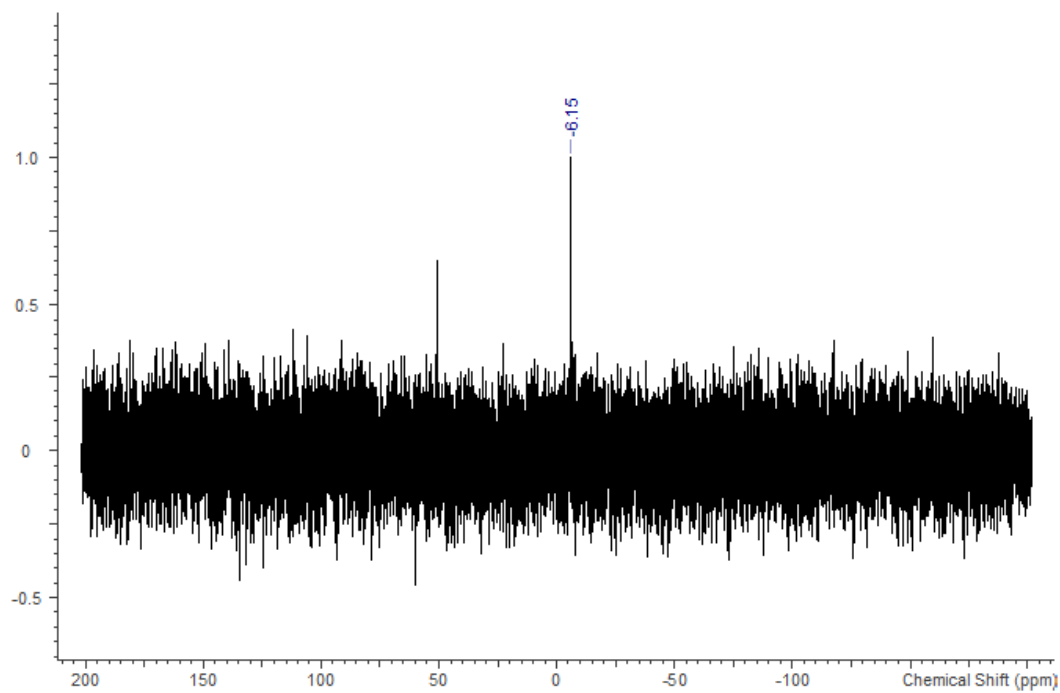

**Figure S11.**  $^{29}\text{Si}\{^1\text{H}\}$  NMR spectrum of  $[\text{Li}\{\text{N}(\text{Si}^t\text{BuMe}_2)_2\}\{\mu\text{-N}(\text{Si}^t\text{BuMe}_2)_2\}\text{Li}(\text{THF})]$  (**4**) in  $\text{C}_6\text{D}_6$ .

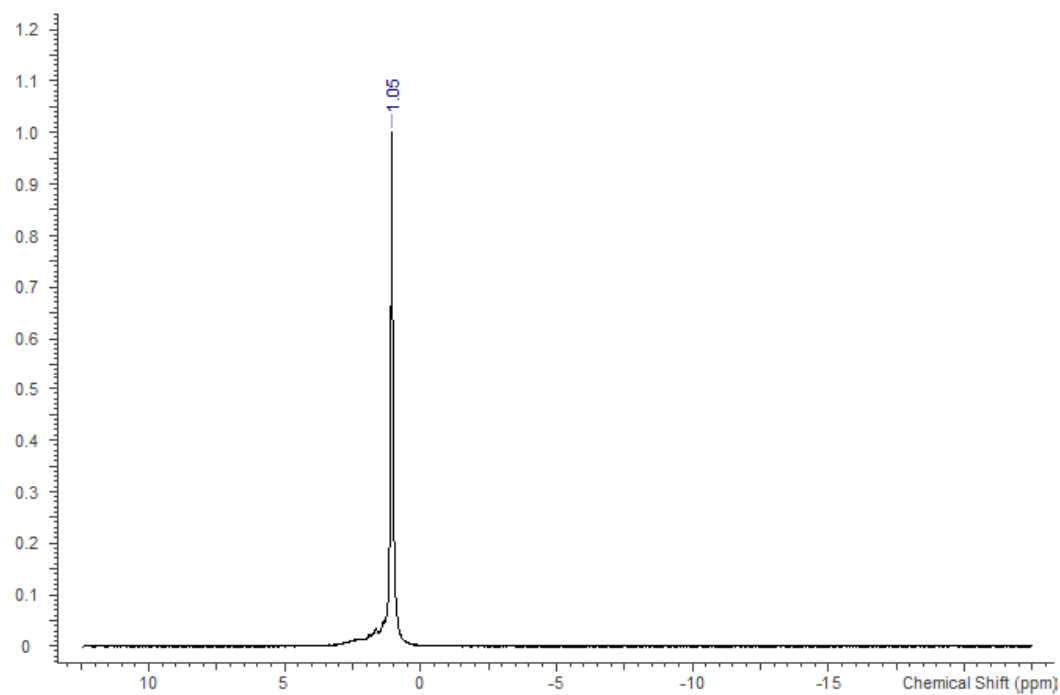

**Figure S12.**  $^7\text{Li}\{^1\text{H}\}$  NMR spectrum of  $[\text{Li}\{\text{N}(\text{Si}^t\text{BuMe}_2)_2\}\{\mu\text{-N}(\text{Si}^t\text{BuMe}_2)_2\}\text{Li}(\text{THF})]$  (**4**) in  $\text{C}_6\text{D}_6$ .

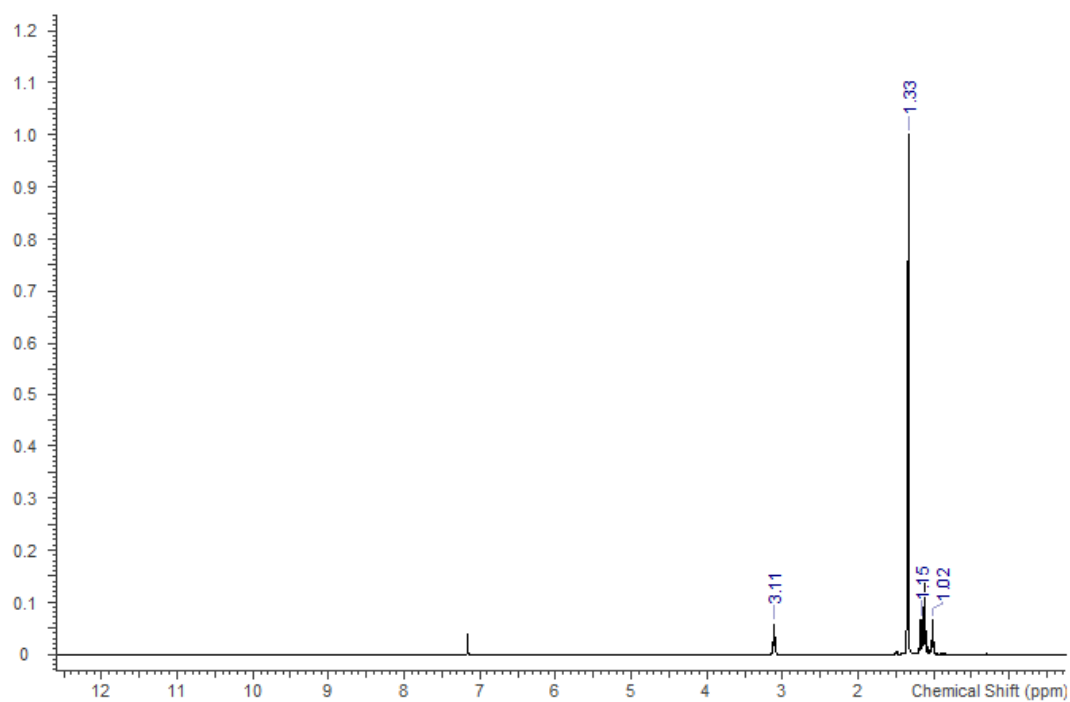

**Figure S13.** <sup>1</sup>H NMR spectrum of [Li{N(SiPr<sub>3</sub>)<sub>2</sub>}(THF)] (7) in C<sub>6</sub>D<sub>6</sub>.

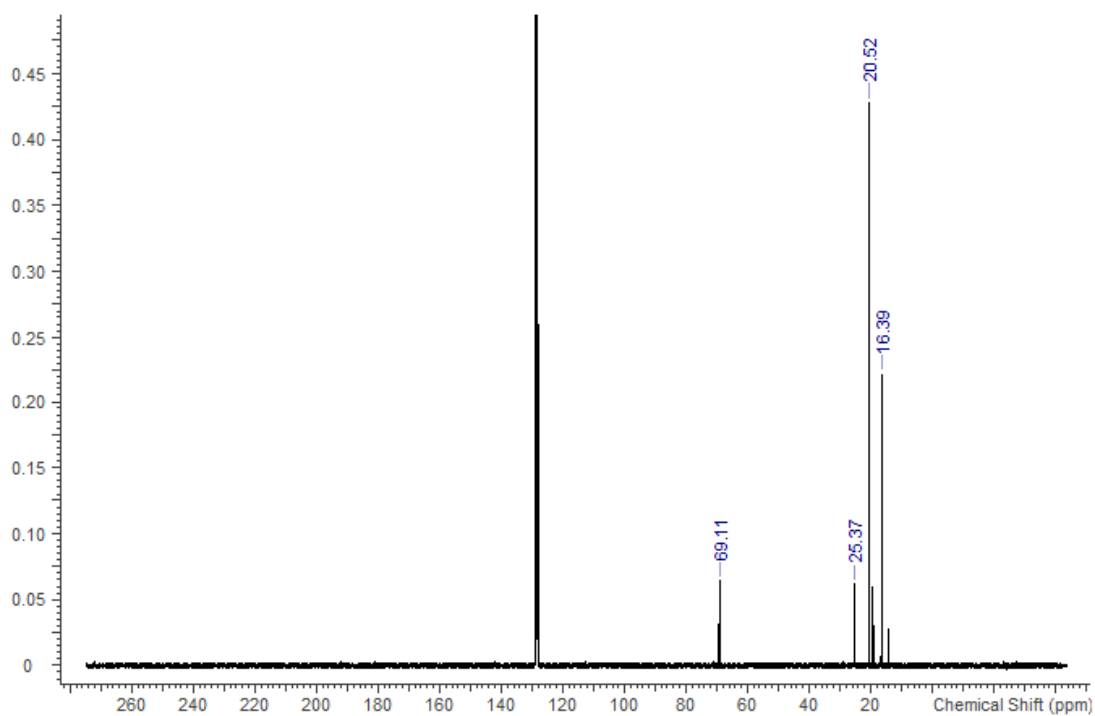

**Figure S14.** <sup>13</sup>C{<sup>1</sup>H} NMR spectrum of [Li{N(SiPr<sub>3</sub>)<sub>2</sub>}(THF)] (7) in C<sub>6</sub>D<sub>6</sub>.



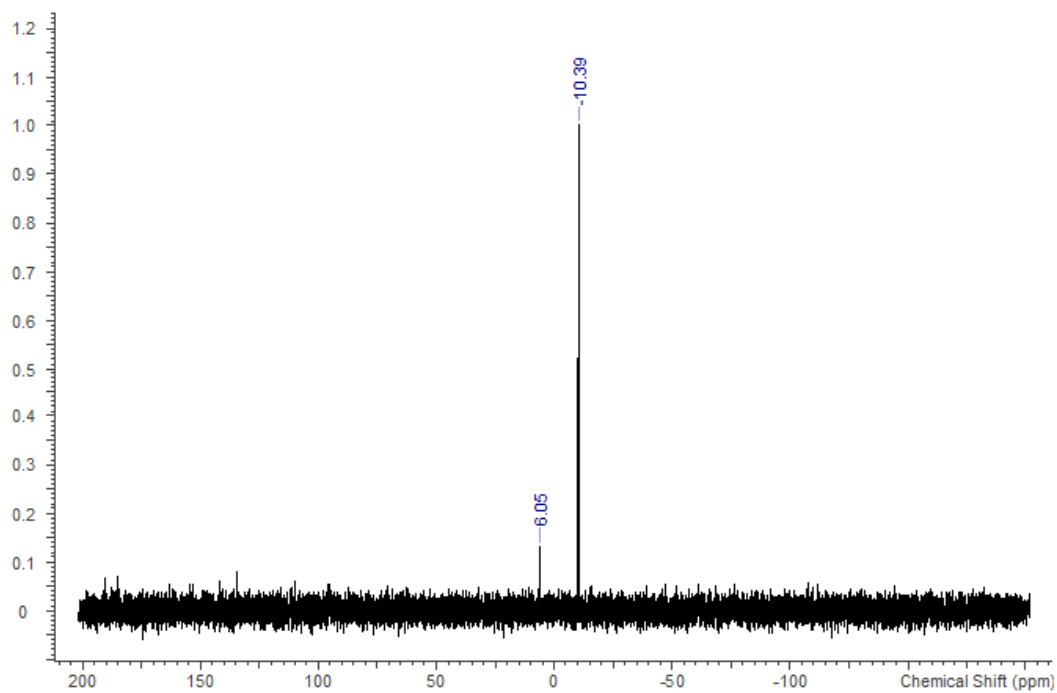

**Figure S15.**  $^{29}\text{Si}\{^1\text{H}\}$  NMR spectrum of  $[\text{Li}\{\text{N}(\text{Si}^i\text{Pr}_3)_2\}(\text{THF})]$  (**7**) in  $\text{C}_6\text{D}_6$ .

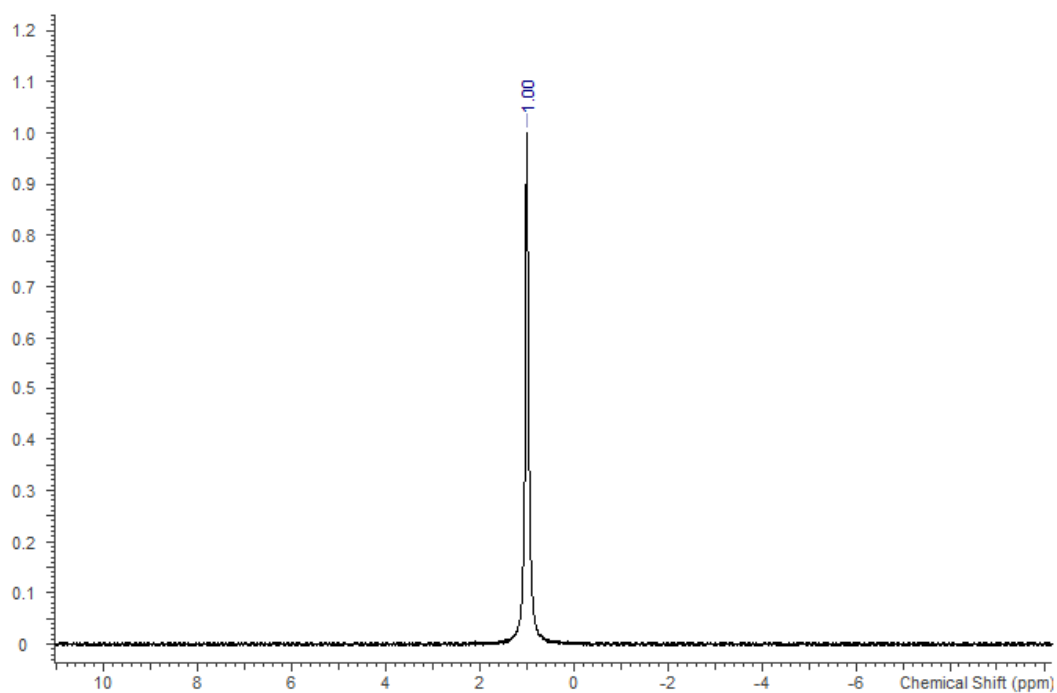

**Figure S16.**  $^7\text{Li}\{^1\text{H}\}$  NMR spectrum of  $[\text{Li}\{\text{N}(\text{Si}^i\text{Pr}_3)_2\}(\text{THF})]$  (**7**) in  $\text{C}_6\text{D}_6$ .

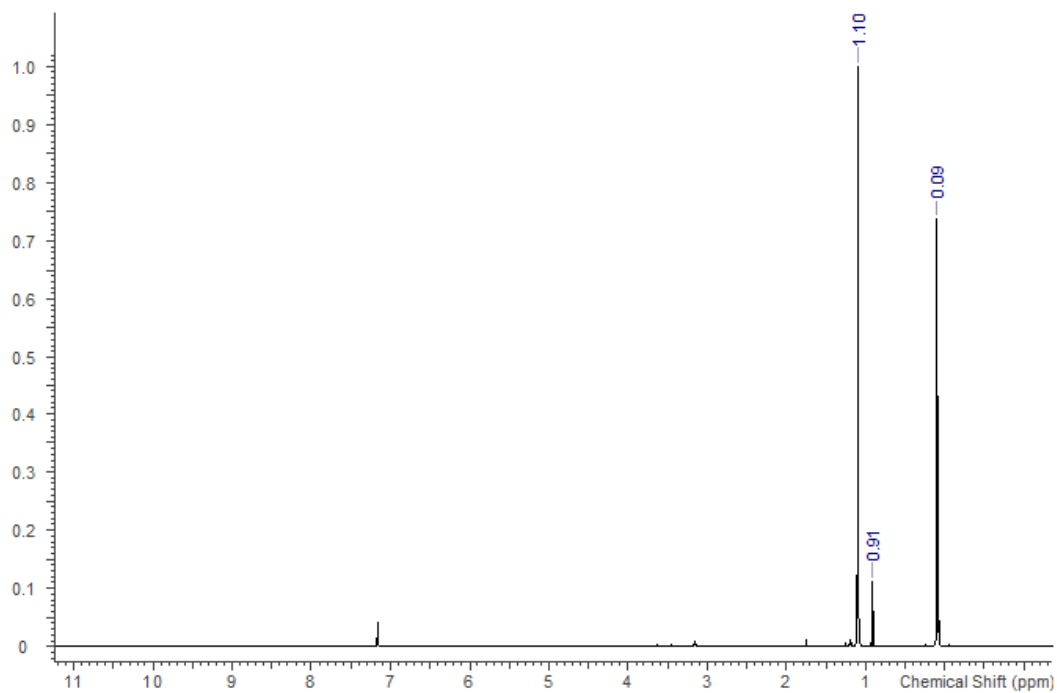

**Figure S17.**  $^1\text{H}$  NMR spectrum of  $[\text{Na}\{\text{N}(\text{Si}^t\text{BuMe}_2)\}]_n$  (**9**) in  $\text{C}_6\text{D}_6$ .

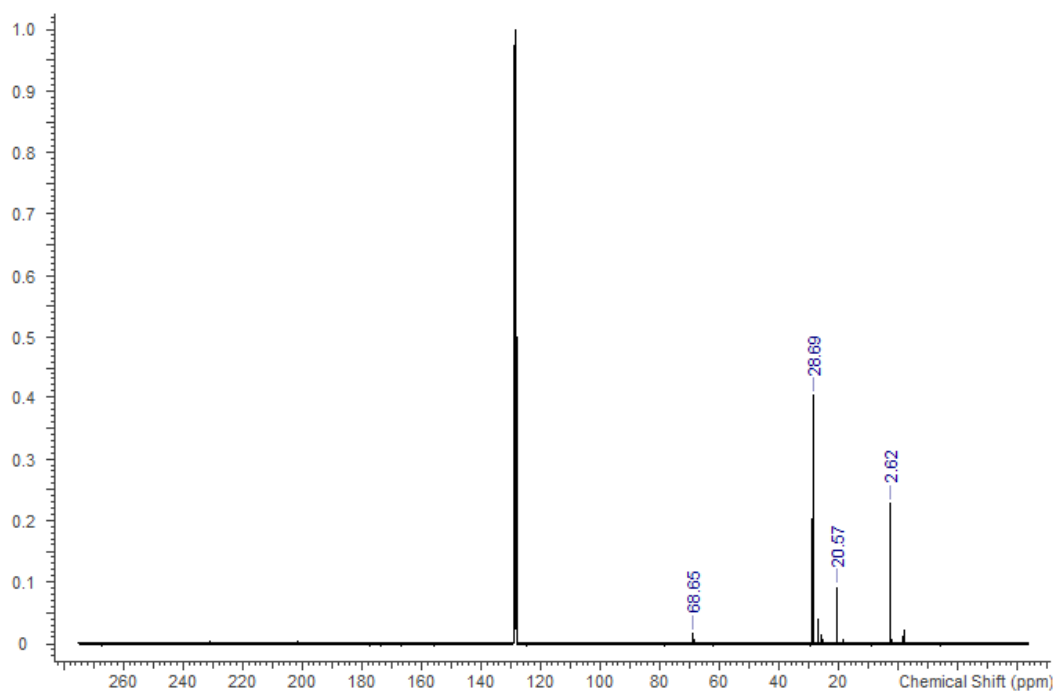

**Figure S18.**  $^{13}\text{C}\{^1\text{H}\}$  NMR spectrum of  $[\text{Na}\{\text{N}(\text{Si}^t\text{BuMe}_2)\}]_n$  (**9**) in  $\text{C}_6\text{D}_6$ .

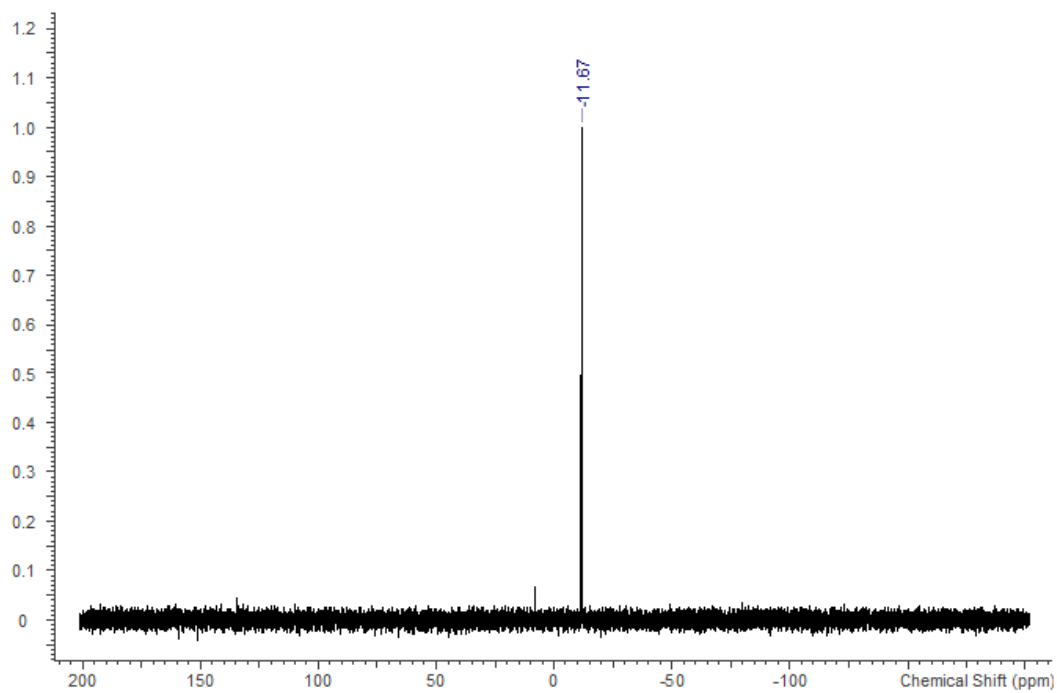

**Figure S19.**  $^{29}\text{Si}\{^1\text{H}\}$  NMR spectrum of  $[\text{Na}\{\text{N}(\text{Si}^t\text{BuMe}_2)\}]_n$  (**9**) in  $\text{C}_6\text{D}_6$ .

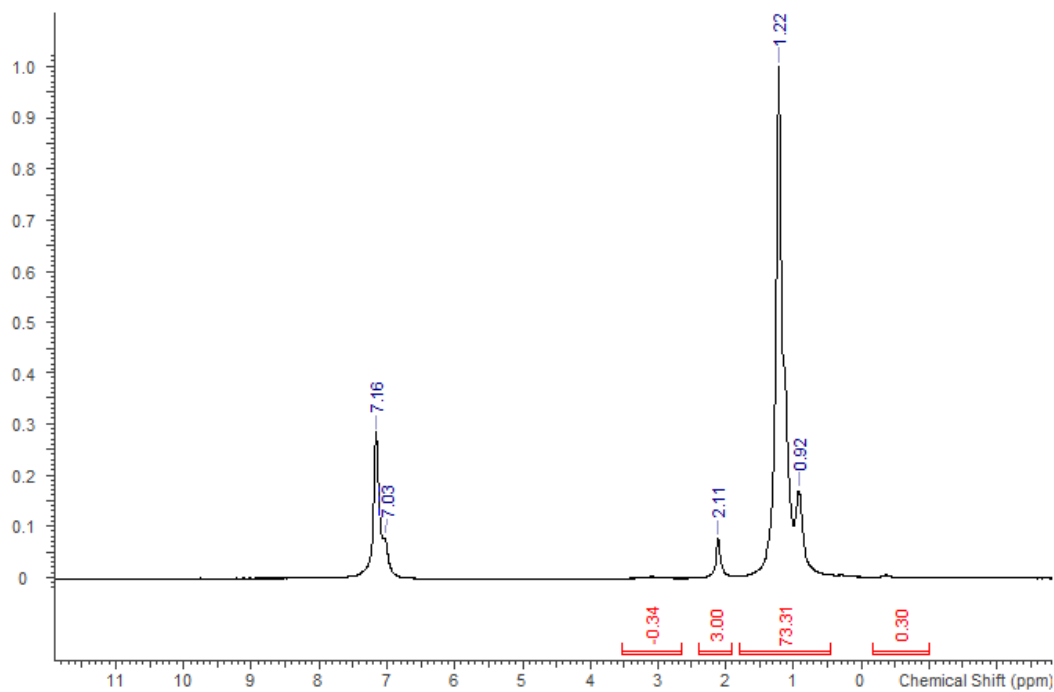

**Figure S20.**  $^1\text{H}$  NMR spectrum of  $[\text{Na}\{\text{N}(\text{Si}^i\text{Pr}_3)_2\}(\text{C}_7\text{H}_8)]$  (**10**) in  $\text{C}_6\text{D}_6$ .

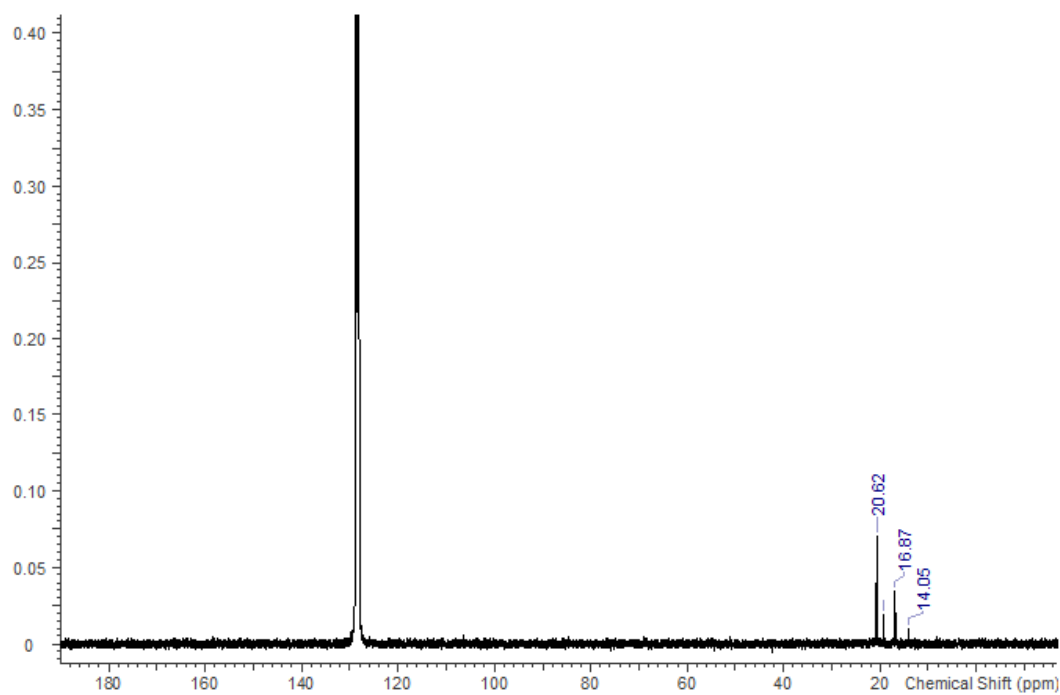

**Figure S21.**  $^{13}\text{C}\{^1\text{H}\}$  NMR spectrum of  $[\text{Na}\{\text{N}(\text{Si}^i\text{Pr}_3)_2\}(\text{C}_7\text{H}_8)]$  (10) in  $\text{C}_6\text{D}_6$ .

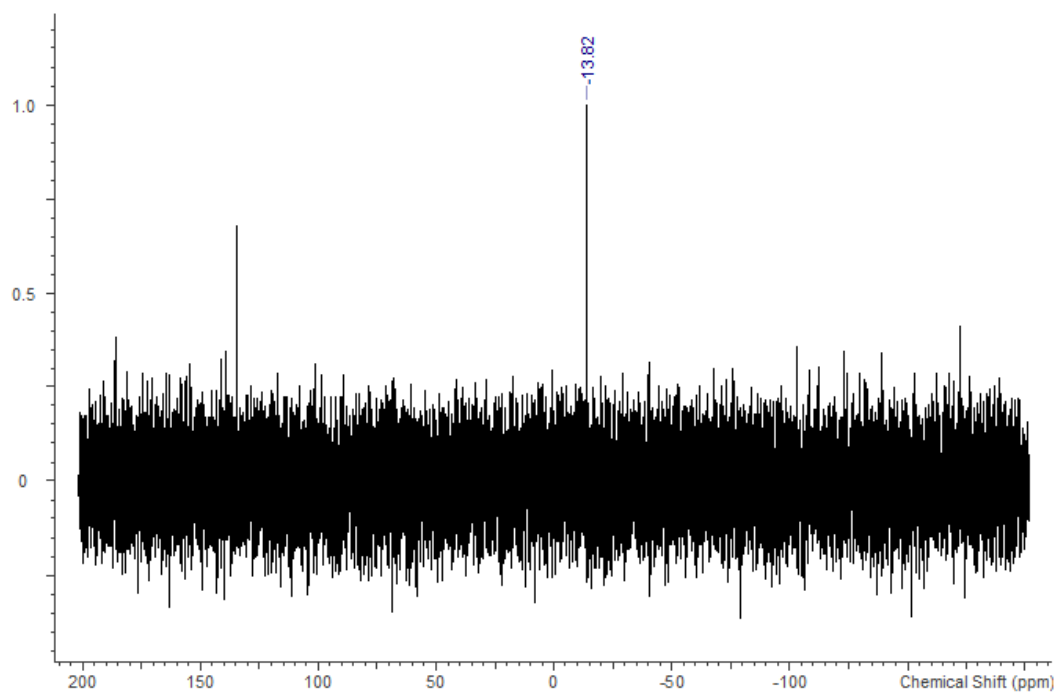

**Figure S22.**  $^{29}\text{Si}\{^1\text{H}\}$  NMR spectrum of  $[\text{Na}\{\text{N}(\text{Si}^i\text{Pr}_3)_2\}(\text{C}_7\text{H}_8)]$  (10) in  $\text{C}_6\text{D}_6$ .

## 2. FTIR spectra

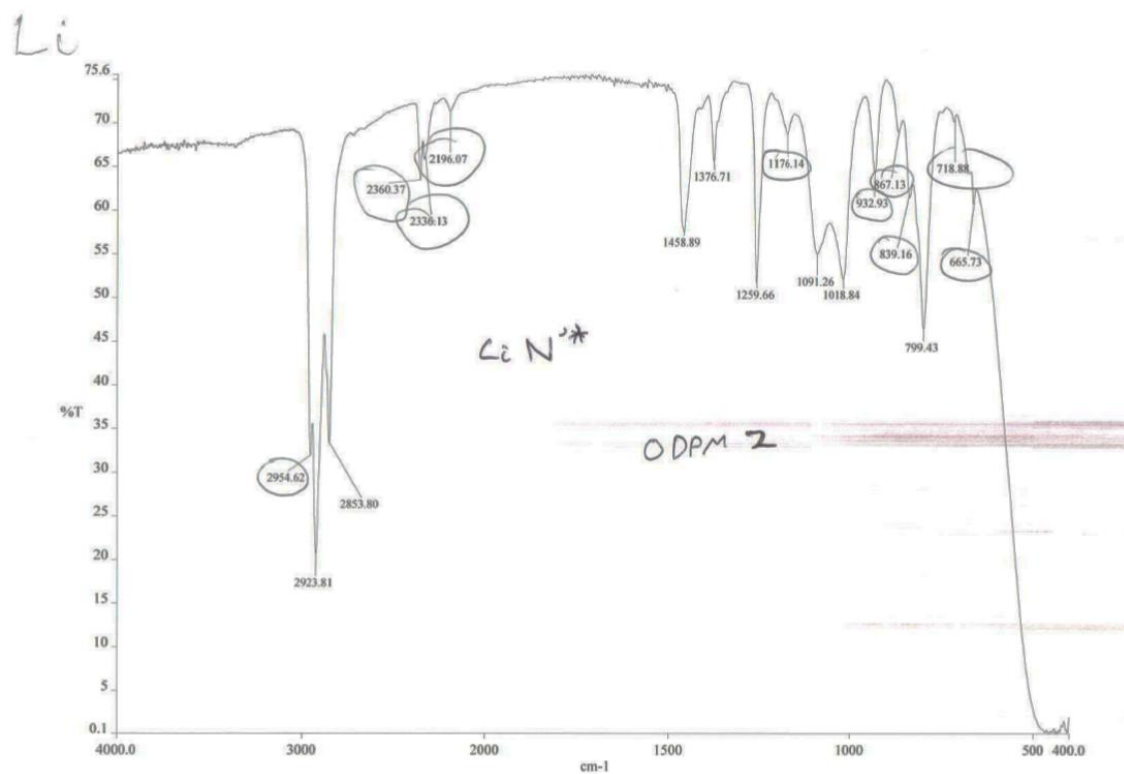

**Figure S23.** FTIR spectrum of  $[\text{Li}\{\mu\text{-N}(\text{Si}^i\text{BuMe}_2)(\text{SiMe}_3)\}]_2$  (**2**) (Nujol mull).

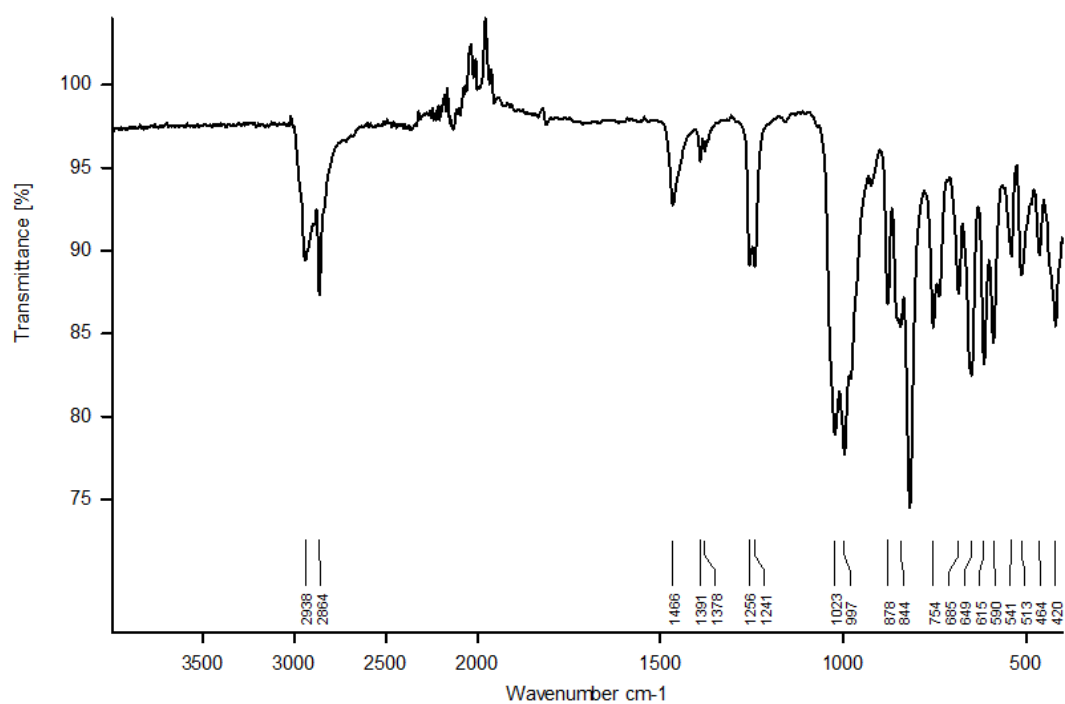

**Figure S24.** ATR-IR spectrum of  $[\text{Li}\{\mu\text{-N}(\text{Si}^i\text{Pr}_3)(\text{SiMe}_3)\}]_2$  (**3**).

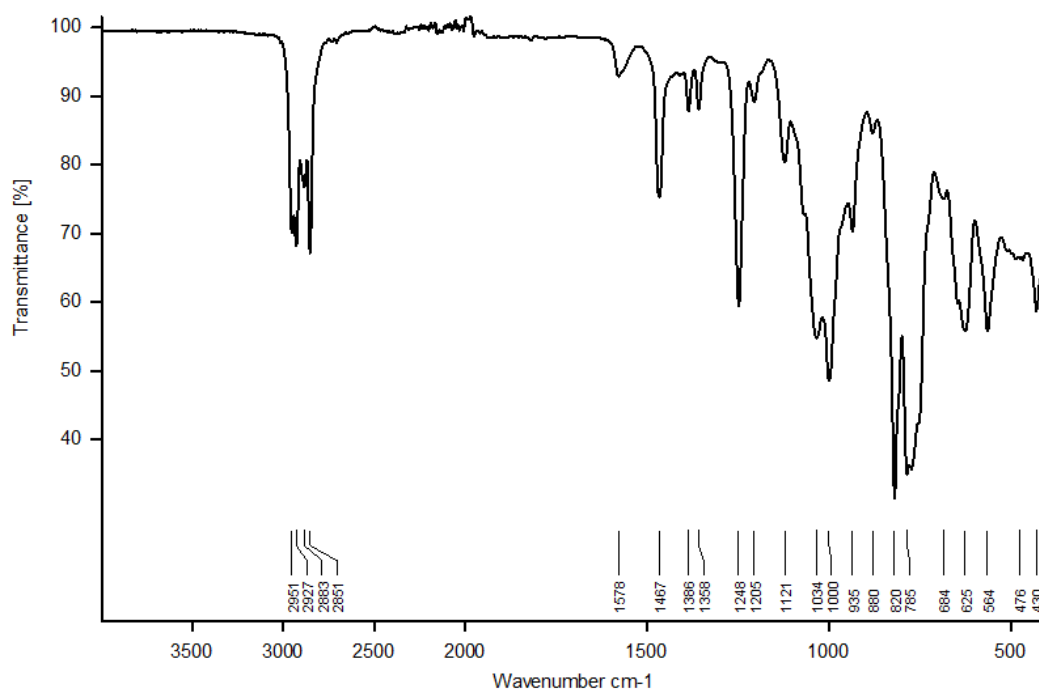

**Figure S25.** ATR-IR spectrum of  $[\text{Li}\{\text{N}(\text{Si}^t\text{BuMe}_2)\}\{\mu\text{-N}(\text{Si}^t\text{BuMe}_2)\}_2\text{Li}(\text{THF})]$  (**4**).

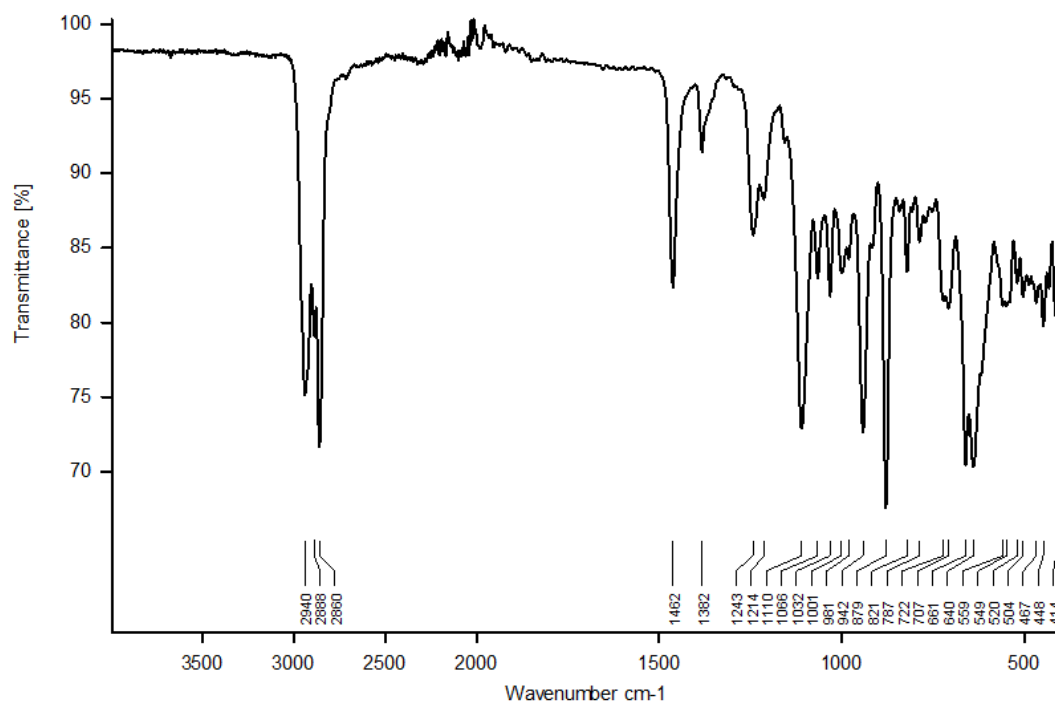

**Figure S26.** ATR-IR spectrum of  $[\text{Li}\{\text{N}(\text{Si}^t\text{Pr}_3)\}(\text{THF})]$  (**7**).

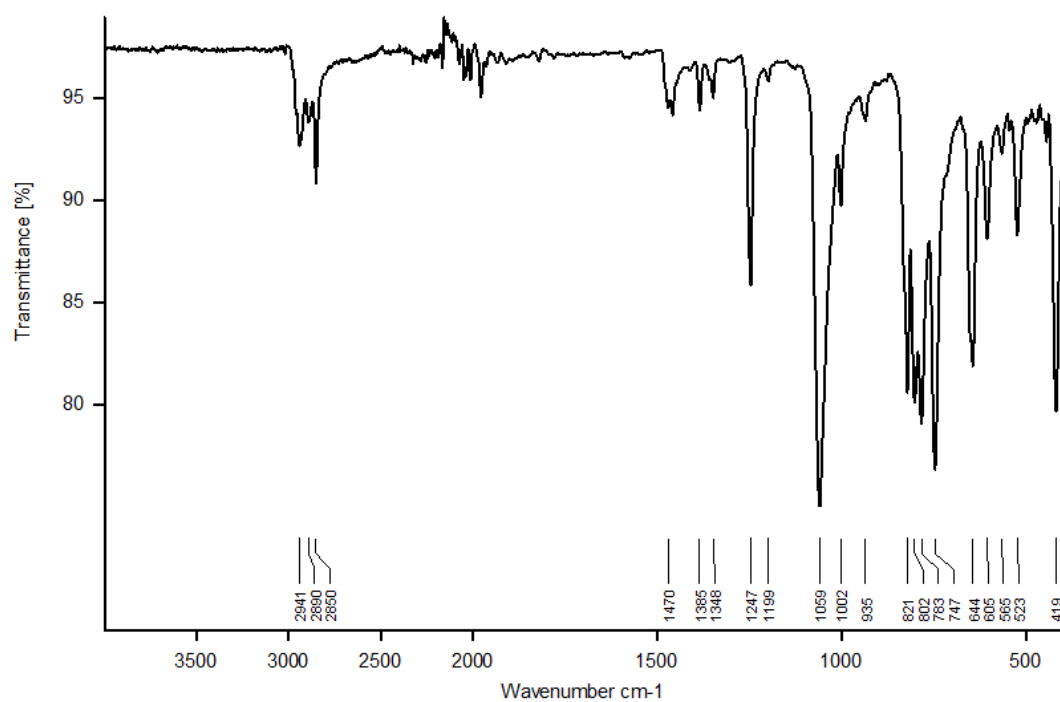

**Figure S27.** ATR-IR spectrum of  $[\text{Na}\{\text{N}(\text{Si}^i\text{BuMe}_2)_2\}]_n$  (**9**).

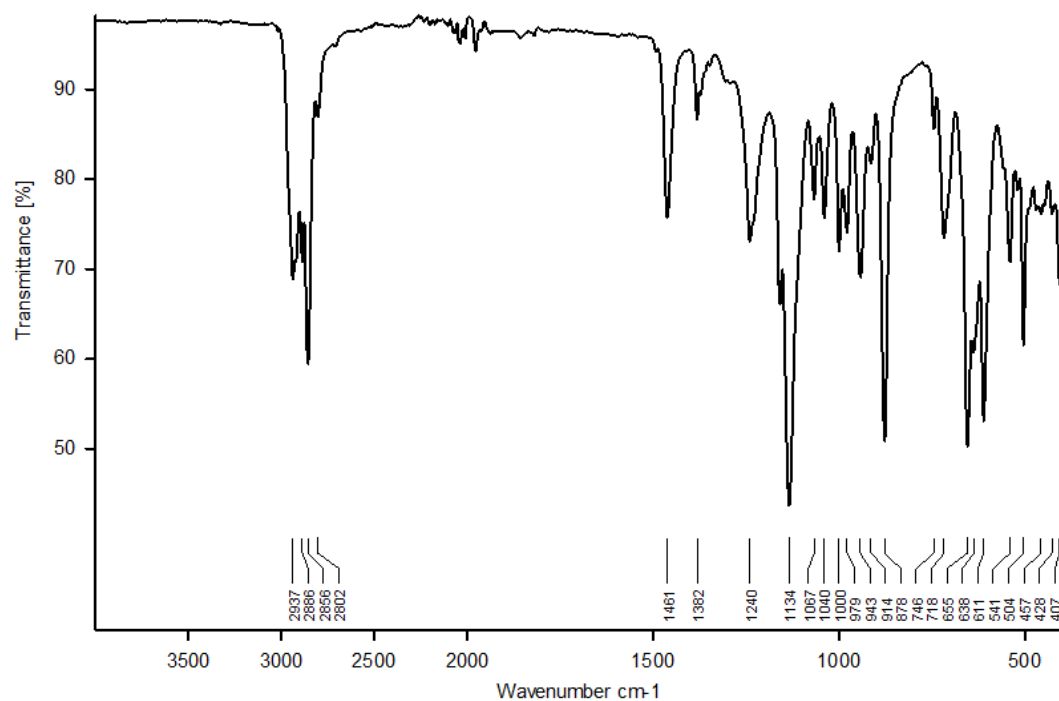

**Figure S28.** ATR-IR spectrum of  $[\text{Na}\{\text{N}(\text{Si}^i\text{Pr}_3)_2\}(\text{C}_7\text{H}_8)]$  (**10**).

### 3. X-ray Crystallography

Crystals of **1-10** were alternately examined on a Bruker Apex II diffractometer with a CCD area detector and a graphite-monochromated Cu K $\alpha$  radiation ( $\lambda = 1.54178 \text{ \AA}$ ) (**1** and **10**), a Rigaku Oxford Diffraction SuperNova CCD area detector diffractometer using mirror-monochromated Mo K $\alpha$  radiation ( $\lambda = 0.71073 \text{ \AA}$ ) (**3**, **5-6**, and **9-THF**), a Rigaku XtalLAB AFC11 diffractometer with a CCD area detector and graphite-monochromated Cu K $\alpha$  radiation ( $\lambda = 1.54178 \text{ \AA}$ ) (**7**) or an Oxford Diffraction Xcalibur diffractometer with a CCD area detector and a mirror-monochromated Mo K $\alpha$  radiation ( $\lambda = 0.71073 \text{ \AA}$ ) (**2**, **4** and **8**). Intensities were integrated from data recorded on  $1^\circ$  frames by  $\omega$  and  $\varphi$  rotation in **10**; on  $0.5^\circ$  frames by  $\omega$  and  $\varphi$  rotation in **1** and **7**; on  $1.0^\circ$  frames by  $\omega$  rotation in **2-6**, and **8**; and on  $0.9^\circ$  frames by  $\omega$  rotation in **9-THF**. Cell parameters were refined from the observed positions of all strong reflections in each data set. A Gaussian grid face-indexed absorption correction with beam profile modeling was applied in all instances through CrysAlisPro [1]. The structures were by intrinsic phasing in SHELXT [2] or direct methods in SHELXL [3] and the datasets were refined by full-matrix least-squares on all unique F<sup>2</sup> values [3,3] with anisotropic displacement parameters for all non-hydrogen atoms, and with constrained riding hydrogen geometries; Uiso(H) was set at 1.2 (1.5 for methyl groups) times Ueq of the parent atom. The largest features in final difference syntheses were close to heavy atoms and were of no chemical significance. CrysAlisPro [1] was used for control and integration, and SHELX [3] was employed through OLEX2 [4] for structure solution and refinement. ORTEP-3 [5] and POV-Ray [6] were employed for molecular graphics. Supplementary crystallographic data for all complexes are compiled in Tables S1 and S2, whilst selected bond lengths and angles are compiled in Tables S3 and S4.



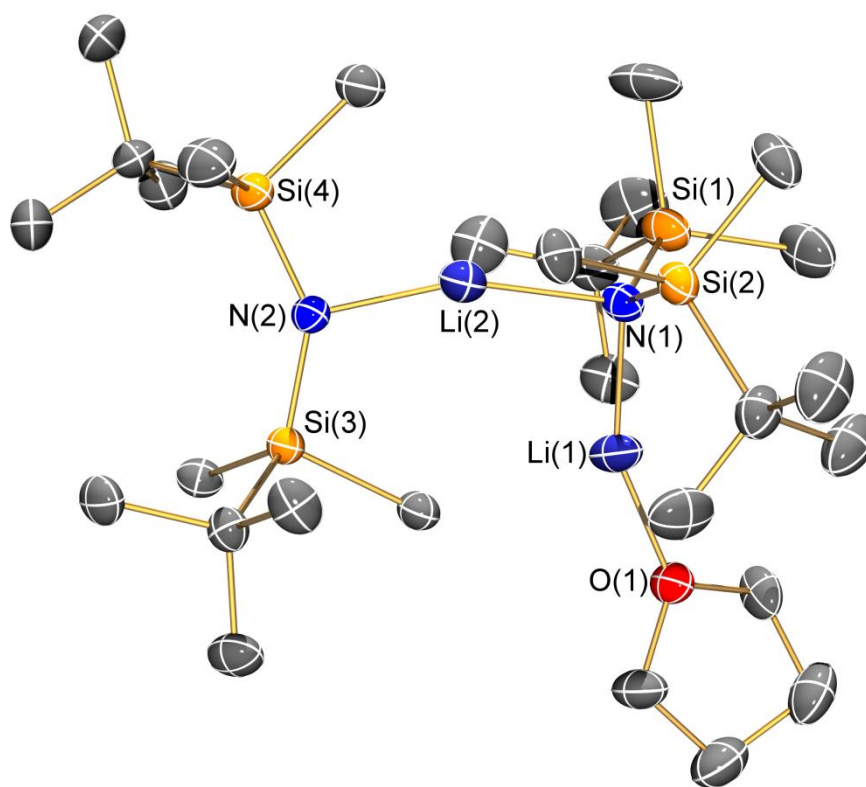

**Figure S29.** Molecular structure of  $[\text{Li}\{\text{N}(\text{Si}^t\text{BuMe}_2)_2\}\{\mu\text{-N}(\text{Si}^t\text{BuMe}_2)_2\}\text{Li}(\text{THF})]$  (**4**) with selective atom labelling. Displacement ellipsoids set at 30 % probability level and hydrogen atoms omitted for clarity.

**Table S1.** Selected crystallographic data for **1-5**.

|                                                                                                                     | <b>1</b>                                         | <b>2</b>                                                                       | <b>3</b>                                                                       | <b>4</b>                                                                        | <b>5</b>                                                                       |
|---------------------------------------------------------------------------------------------------------------------|--------------------------------------------------|--------------------------------------------------------------------------------|--------------------------------------------------------------------------------|---------------------------------------------------------------------------------|--------------------------------------------------------------------------------|
| Formula                                                                                                             | C <sub>18</sub> H <sub>43</sub> NSi <sub>2</sub> | C <sub>18</sub> H <sub>48</sub> Li <sub>2</sub> N <sub>2</sub> Si <sub>4</sub> | C <sub>24</sub> H <sub>60</sub> Li <sub>2</sub> N <sub>2</sub> Si <sub>4</sub> | C <sub>28</sub> H <sub>68</sub> Li <sub>2</sub> N <sub>2</sub> OSi <sub>4</sub> | C <sub>32</sub> H <sub>78</sub> Li <sub>4</sub> N <sub>2</sub> Si <sub>4</sub> |
| Fw                                                                                                                  | 329.71                                           | 418.82                                                                         | 502.98                                                                         | 575.08                                                                          | 631.08                                                                         |
| Cryst size, mm                                                                                                      | 0.05 x 0.10 x 0.10                               | 0.14 x 0.20 x 0.40                                                             | 0.17 x 0.27 x 0.57                                                             | 0.18 x 0.28 x 0.53                                                              | 0.17 x 0.26 x 0.34                                                             |
| Crystal system                                                                                                      | Monoclinic                                       | Triclinic                                                                      | Triclinic                                                                      | Monoclinic                                                                      | Triclinic                                                                      |
| Space group                                                                                                         | <i>P</i> 2 <sub>1</sub> / <i>n</i>               | <i>P</i> −1                                                                    | <i>P</i> −1                                                                    | <i>P</i> 2 <sub>1</sub> / <i>c</i>                                              | <i>P</i> −1                                                                    |
| <i>a</i> , Å                                                                                                        | 8.81051(9)                                       | 10.2374(8)                                                                     | 12.4492(4)                                                                     | 16.2998(17)                                                                     | 9.1355(11)                                                                     |
| <i>b</i> , Å                                                                                                        | 13.36759(16)                                     | 11.9719(8)                                                                     | 16.4469(6)                                                                     | 12.2405(7)                                                                      | 11.0906(18)                                                                    |
| <i>c</i> , Å                                                                                                        | 18.58518(19)                                     | 12.6730(7)                                                                     | 17.6144(6)                                                                     | 20.6644(19)                                                                     | 12.644(2)                                                                      |
| $\alpha$ , °                                                                                                        | 90                                               | 83.508(5)                                                                      | 67.932(3)                                                                      | 90                                                                              | 63.996(16)                                                                     |
| $\beta$ , °                                                                                                         | 99.1278(10)                                      | 76.177(6)                                                                      | 80.537(3)                                                                      | 112.441(12)                                                                     | 77.951(12)                                                                     |
| $\gamma$ , °                                                                                                        | 90                                               | 68.182(7)                                                                      | 89.926(3)                                                                      | 90                                                                              | 68.950(13)                                                                     |
| <i>V</i> , Å <sup>3</sup>                                                                                           | 2161.16(4)                                       | 1399.69(18)                                                                    | 3289.6(2)                                                                      | 3810.7(7)                                                                       | 1072.5(3)                                                                      |
| <i>Z</i>                                                                                                            | 4                                                | 2                                                                              | 4                                                                              | 4                                                                               | 1                                                                              |
| $\rho_{\text{calcd}}$ , g cm <sup>3</sup>                                                                           | 1.013                                            | 0.994                                                                          | 1.016                                                                          | 1.002                                                                           | 0.977                                                                          |
| $\mu$ , mm <sup>−1</sup>                                                                                            | 1.436                                            | 0.217                                                                          | 0.194                                                                          | 0.176                                                                           | 0.159                                                                          |
| <i>F</i> (000)                                                                                                      | 744                                              | 464                                                                            | 1120                                                                           | 1280                                                                            | 352                                                                            |
| No. of reflns (unique)                                                                                              | 15671 (3938)                                     | 7336 (5102)                                                                    | 21307 (11975)                                                                  | 11902 (5777)                                                                    | 5957 (3865)                                                                    |
| <i>S</i> <sup>1</sup>                                                                                               | 1.07                                             | 1.03                                                                           | 1.03                                                                           | 1.00                                                                            | 218                                                                            |
| <i>R</i> <sub>1</sub> ( <i>wR</i> <sub>2</sub> <sup>1</sup> ) ( <i>F</i> <sup>2</sup> >2σ( <i>F</i> <sup>2</sup> )) | 0.0399 (0.1124)                                  | 0.0505 (0.1215)                                                                | 0.0443 (0.1082)                                                                | 0.0714 (0.1846)                                                                 | 0.0806 (0.2168)                                                                |
| <i>R</i> <sub>int</sub>                                                                                             | 0.024                                            | 0.024                                                                          | 0.021                                                                          | 0.076                                                                           | 0.033                                                                          |
| Min/max diff map, Å <sup>−3</sup>                                                                                   | −0.29, 0.44                                      | −0.25, 0.40                                                                    | −0.50, 1.03                                                                    | −0.40, 0.69                                                                     | −0.47, 0.51                                                                    |

<sup>1</sup> Conventional  $R = \sum ||F_o| - |F_c|| / \sum |F_o|$ ;  $R_w = [\sum w(F_o^2 - F_c^2)^2 / \sum w(F_o^2)^2]^{1/2}$ ;  $S = [\sum w(F_o^2 - F_c^2)^2 / \text{no. data} - \text{no. params}]^{1/2}$  for all data.

**Table S2.** Selected crystallographic data for **6-10**.

|                                                                                                                     | <b>6</b>                                                          | <b>7</b>                                            | <b>8</b>                                                          | <b>9-THF</b>                                                                                  | <b>10</b>                                          |
|---------------------------------------------------------------------------------------------------------------------|-------------------------------------------------------------------|-----------------------------------------------------|-------------------------------------------------------------------|-----------------------------------------------------------------------------------------------|----------------------------------------------------|
| Formula                                                                                                             | C <sub>19</sub> H <sub>46</sub> LiNO <sub>2</sub> Si <sub>2</sub> | C <sub>22</sub> H <sub>50</sub> LiNOSi <sub>2</sub> | C <sub>26</sub> H <sub>58</sub> LiNO <sub>2</sub> Si <sub>2</sub> | C <sub>32</sub> H <sub>76</sub> N <sub>2</sub> Na <sub>2</sub> O <sub>2</sub> Si <sub>4</sub> | C <sub>25</sub> H <sub>50</sub> NNaSi <sub>2</sub> |
| Fw                                                                                                                  | 383.69                                                            | 407.75                                              | 479.85                                                            | 679.28                                                                                        | 443.83                                             |
| Cryst size, mm                                                                                                      | 0.10 x 0.10 x 0.30                                                | 0.14 x 0.23 x 0.40                                  | 0.22 x 0.42 x 0.43                                                | 0.14 x 0.41 x 0.54                                                                            | 0.10 x 0.10 x 0.20                                 |
| Crystal system                                                                                                      | Monoclinic                                                        | Monoclinic                                          | Triclinic                                                         | Triclinic                                                                                     | Monoclinic                                         |
| Space group                                                                                                         | <i>P</i> 2 <sub>1</sub> / <i>c</i>                                | <i>P</i> 2 <sub>1</sub> / <i>c</i>                  | <i>P</i> -1                                                       | <i>P</i> -1                                                                                   | <i>P</i> 2 <sub>1</sub> / <i>c</i>                 |
| a, Å                                                                                                                | 17.6846(12)                                                       | 16.30145(13)                                        | 10.5111(5)                                                        | 9.9185(9)                                                                                     | 18.2177(3)                                         |
| b, Å                                                                                                                | 9.6929(6)                                                         | 20.68971(16)                                        | 15.9508(6)                                                        | 10.8375(7)                                                                                    | 9.00185(10)                                        |
| c, Å                                                                                                                | 30.5856(17)                                                       | 16.01395(13)                                        | 18.7477(10)                                                       | 11.0792(7)                                                                                    | 17.2035(2)                                         |
| α, °                                                                                                                | 90                                                                | 90                                                  | 85.086(4)                                                         | 98.833(5)                                                                                     | 90                                                 |
| β, °                                                                                                                | 104.603(7)                                                        | 100.9135(8)                                         | 84.850(4)                                                         | 103.526(6)                                                                                    | 95.3841(12)                                        |
| γ, °                                                                                                                | 90                                                                | 90                                                  | 83.646(4)                                                         | 109.936(7)                                                                                    | 90                                                 |
| V, Å <sup>3</sup>                                                                                                   | 5073.5(6)                                                         | 5303.38(7)                                          | 3102.2(3)                                                         | 1052.45(15)                                                                                   | 2808.81(6)                                         |
| Z                                                                                                                   | 8                                                                 | 8                                                   | 4                                                                 | 1                                                                                             | 4                                                  |
| ρ <sub>calcd</sub> , g cm <sup>3</sup>                                                                              | 1.005                                                             | 1.021                                               | 1.027                                                             | 1.072                                                                                         | 1.050                                              |
| μ, mm <sup>-1</sup>                                                                                                 | 0.150                                                             | 1.272                                               | 0.134                                                             | 0.189                                                                                         | 1.358                                              |
| <i>F</i> (000)                                                                                                      | 1712                                                              | 1824                                                | 1072                                                              | 376                                                                                           | 984                                                |
| No. of reflns (unique)                                                                                              | 18729 (10309)                                                     | 39310 (9689)                                        | 19100 (1127)                                                      | 7491 (4318)                                                                                   | 14931 (5057)                                       |
| S <sup>1</sup>                                                                                                      | 1.02                                                              | 1.05                                                | 1.02                                                              | 1.03                                                                                          | 1.04                                               |
| <i>R</i> <sub>1</sub> (w <i>R</i> <sub>2</sub> <sup>1</sup> ) ( <i>F</i> <sup>2</sup> >2σ( <i>F</i> <sup>2</sup> )) | 0.0571 (0.1419)                                                   | 0.0395 (0.1080)                                     | 0.0576 (0.1545)                                                   | 0.0594 (0.1561)                                                                               | 0.0363 (0.1030)                                    |
| <i>R</i> <sub>int</sub>                                                                                             | 0.035                                                             | 0.028                                               | 0.027                                                             | 0.031                                                                                         | 0.025                                              |
| Min/max diff map, Å <sup>-3</sup>                                                                                   | -0.56, 0.56                                                       | -0.53, 0.61                                         | -0.37, 0.64                                                       | -0.41, 0.49                                                                                   | -0.30, 0.40                                        |

<sup>1</sup> Conventional  $R = \sum ||F_o| - |F_c|| / \sum |F_o|$ ;  $R_w = [\sum w(F_o^2 - F_c^2)^2 / \sum w(F_o^2)^2]^{1/2}$ ;  $S = [\sum w(F_o^2 - F_c^2)^2 / \text{no. data} - \text{no. params}]^{1/2}$  for all data.

**Table S3.** Selected bond lengths (Å) and angles (°) for **1-5**.

|                          | <b>1</b>   | <b>2</b>   | <b>3</b>   | <b>4</b>  | <b>5</b>  |
|--------------------------|------------|------------|------------|-----------|-----------|
| N(1)–Si(1)               | 1.7348(12) | 1.701(2)   | 1.711(2)   | 1.712(4)  | 1.714(4)  |
| N(1)–Si(2)               | 1.7370(12) | 1.704(2)   | 1.707(2)   | 1.728(4)  | 1.713(5)  |
| Li(1)–N(1)               | -          | 2.015(5)   | 2.022(4)   | 1.974(10) | 1.986(9)  |
| Li(1)–N(2)               | -          | 1.986(5)   | 2.032(4)   | -         | -         |
| Li(2)–N(1)               | -          | 1.982(5)   | 2.036(4)   | 2.026(8)  | 1.946(12) |
| Li(2)–N(2)               | -          | 2.023(5)   | 2.030(4)   | 1.915(9)  | -         |
| N(2)–Si(3)               | -          | 1.706(2)   | 1.708(2)   | 1.667(4)  | -         |
| N(2)–Si(4)               | -          | 1.701(2)   | 1.705(2)   | 1.679(3)  | -         |
| Li(1)–O(1)               | -          | -          | -          | 1.891(8)  | -         |
| Li(1)–C(13)              | -          | -          | -          | -         | 2.037(9)  |
| Li ••C distances < 2.5 Å | -          | 2.378(6)   | 2.378(6)   | -         | -         |
|                          | -          | 2.392(7)   | 2.392(7)   | -         | -         |
|                          | -          | 2.393(7)   | -          | -         | -         |
|                          | -          | 2.427(6)   | -          | -         | -         |
| Si(1)–N(1)–Si(2)         | 145.43(8)  | 125.33(12) | 127.91(11) | 121.0(2)  | 131.0(3)  |
| Si(3)–N(2)–Si(4)         | -          | 125.29(13) | 127.87(11) | 144.2(2)  | -         |
| N(1)–Li(1)–N(2)          | -          | 109.1(2)   | 110.1(2)   | -         | -         |
| N(1)–Li(2)–N(2)          | -          | 109.0(2)   | 110.0(2)   | 160.2(4)  | -         |
| Li(1)–N(1)–Li(2)         | -          | 71.0(2)    | 69.8(2)    | 97.6(3)   | 95.7(5)   |
| Li(1)–N(2)–Li(2)         | -          | 70.8(2)    | 69.5(2)    | -         | -         |
| N(1)–Li(1)–O(1)          | -          | -          | -          | 155.4(5)  | -         |
| N(1)–Li(1)–C(13)         | -          | -          | -          | -         | 171.9(5)  |
| N(1A)–Li(2A)–C(13)       | -          | -          | -          | -         | 173.9(7)  |
| Li(1)–C(13)–Li(2A)       | -          | -          | -          | -         | 91.7(4)   |

**Table S4.** Selected bond lengths (Å) and angles (°) for **6-10** (M = Li, **6-8**; Na, **9-10**).

|                                | <b>6</b>   | <b>7</b>   | <b>8</b>   | <b>9-THF</b> | <b>10</b>  |
|--------------------------------|------------|------------|------------|--------------|------------|
| N(1)–Si(1)                     | 1.681(2)   | 1.6761(13) | 1.686(2)   | 1.697(3)     | 1.6709(12) |
| N(1)–Si(2)                     | 1.679(5)   | 1.6805(13) | 1.681(2)   | 1.702(3)     | 1.6710(13) |
| M(1)–N(1)                      | 1.894(13)  | 1.893(4)   | 1.953(5)   | 2.490(2)     | 2.2608(14) |
| M(1)–N(2)                      | -          | -          | -          | -            | -          |
| M(2)–N(1)                      | -          | -          | -          | -            | -          |
| M(2)–N(2)                      | -          | -          | -          | -            | -          |
| M(1)–O(1)                      | 1.984(5)   | 1.866(3)   | 1.987(5)   | 2.328(3)     | -          |
| M(1)–O(2)                      | 1.958(3)   | -          | 1.957(5)   | -            | -          |
| Na(1) ⋯ C(19)                  | -          | -          | -          | -            | 2.912(2)   |
| Na(1) ⋯ C(20)                  | -          | -          | -          | -            | 2.815(2)   |
| Na(1) ⋯ C(21)                  | -          | -          | -          | -            | 2.801(2)   |
| Na(1) ⋯ C(22)                  | -          | -          | -          | -            | 2.870(2)   |
| Na(1) ⋯ C(23)                  | -          | -          | -          | -            | 2.935(2)   |
| Na(1) ⋯ C(24)                  | -          | -          | -          | -            | 2.956(2)   |
| Na(1) ⋯ Ph <sub>centroid</sub> | -          | -          | -          | -            | 2.527(2)   |
| Si(1)–N(1)–Si(2)               | 135.08(13) | 142.07(8)  | 143.06(13) | 124.18(14)   | 144.09(8)  |
| N(1)–Na(1)–N(1A)               | -          | -          | -          | 108.47(7)    | -          |
| Na(1)–N(1)–Na(1A)              | -          | -          | -          | 71.53(7)     | -          |
| N(1)–M(1)–O(1)                 | 143.4(3)   | 168.7(2)   | 132.5(3)   | 126.51(7)    | -          |
| N(1)–M(1)–O(2)                 | 133.6(2)   | -          | 130.7(3)   | -            | -          |
| O(1)–M(1)–O(2)                 | 82.8(2)    | -          | 96.6(2)    | -            | -          |

#### 4. References

---

1. *CrysAlis Pro*, Agilent Technologies: Yarnton, England, 2010.
2. Sheldrick, G.M. A short history of *SHELX*. *Acta Cryst., Sect. A*. **2008**, *64*, 112–122.
3. Sheldrick, G.M. Crystal structure refinement with *SHELXL*. *Acta Cryst., Sect. C*. **2015**, *71*, 3–8.
4. Dolomanov, O.V.; Bourhis, L.J.; Gildea, R.J.; Howard, J.A.K.; Puschmann, H. *OLEX2*: a complete structure solution, refinement and analysis program. *J. Appl. Cryst.* **2009**, *42*, 339–341.
5. Farrugia, L.J. *WinGX* and *Ortep* for Windows: an update. *J. Appl. Cryst.* **2012**, *45*, 849–854.
6. *POV-Ray*, Persistence of Vision Raytracer Pty. Ltd.: Williamstown, Australia, 2004.
